# Supplementary material for: Tensin 1 (TNS1) is a modifier gene for low body mass index (BMI) in homozygous [F508del]CFTR patients
Source: PubMed Central journal article supplement (PMC8176904; doi:10.14814/phy2.14886), 2021-06-04
Supplement: PHY2-9-e14886-s001.pdf [file PHY2-9-e14886-s001.pdf]

Table S11: demographic, nutritional, physiological and clinical laboratory characteristics of the study population.

|                             | All                 | homozygous <i>[delF508]CFTR</i> | compound heterozygous<br><i>[delF508]CFTR</i> | non- <i>[delF508]CFTR</i> |
|-----------------------------|---------------------|---------------------------------|-----------------------------------------------|---------------------------|
| n                           | 98                  | 45                              | 42                                            | 11                        |
| Male (%)                    | 50.0                | 46.7                            | 54.8                                          | 45.5                      |
| Age                         | 35.9 (19-74)        | 35.8 (19-61)                    | 36.2 (19-74)                                  | 35.1 (21-71)              |
| EUR/AMR                     | 85/13               | 42/3                            | 33/9                                          | 10/2                      |
| ppFEV1                      | 60.9 (18.2-112.3)   | 58.9 (18.2-109.7)               | 60.6 (23.0-109.2)                             | 70.2 (30.2-112.3)         |
| ppFVC                       | 78.6 (32.4-122.0)   | 78.1 (32.4-122.0)               | 77.2 (37.9-110.7)                             | 85.9 (45.3-111.7)         |
| Height                      | 168.8 (139.7-191.0) | 170.0 (139.7-191.0)             | 167.6 (154.9-188.0)                           | 168.7 (149.9-191.0)       |
| Weight                      | 60.8 (44.2-113.3)   | 61.0 (44.2-109.75)              | 60.8 (45.0-113.3)                             | 59.4 (45.5-106.7)         |
| BMI                         | 22.6 (16.3-38.9)    | 22.2 (17.7-33.2)                | 22.8 (17.7-38.9)                              | 23.4 (16.3-29.1)          |
| Pancreatic Insufficient (%) | 76.5                | 91.1                            | 71.4                                          | 36.4                      |
| Diabetes (%)                | 30.6                | 44.4                            | 16.7                                          | 27.3                      |
| PA (%)                      | 71.1                | 73.3                            | 69.0                                          | 72.7                      |
| MSRA (%)                    | 20.4                | 24.4                            | 16.7                                          | 18.2                      |
| MSSA (%)                    | 29.6                | 26.7                            | 28.6                                          | 45.5                      |
