# Supplementary material for: Tensin 1 (TNS1) is a modifier gene for low body mass index (BMI) in homozygous [F508del]CFTR patients
Source: PubMed Central journal article supplement (PMC8176904; doi:10.14814/phy2.14886), 2021-06-04
Supplement: PHY2-9-e14886-s002.pdf [file PHY2-9-e14886-s002.pdf]

Table SI2: CFTR and TNS1 variant calls for patient cohort.

| PatientID | Gender | CFTR1   | CFTR2   | group | TNS1<br>(rs918949) | TNS1<br>(rs2571445) | TNS1<br>(rs3796028) |
|-----------|--------|---------|---------|-------|--------------------|---------------------|---------------------|
| 12        | Female | F508del | F508del | 1     | 0/1                | 0/1                 | 0/1                 |
| 69        | Male   | F508del | F508del | 1     | 0/1                | 0/1                 | 0/1                 |
| 82        | Male   | F508del | F508del | 1     | 0/1                | 0/1                 | 0/1                 |
| 160       | Male   | F508del | F508del | 1     | 1/1                | 1/1                 | 0/1                 |
| 167       | Female | F508del | F508del | 1     | 1/1                | 1/1                 | 0/1                 |
| 176       | Male   | F508del | F508del | 1     | 0/1                | 0/1                 | 0/1                 |
| 275       | Female | F508del | F508del | 1     | 1/1                | 1/1                 | 0/1                 |
| 282       | Female | F508del | F508del | 1     | 1/1                | 1/1                 | 0/1                 |
| 301       | Female | F508del | F508del | 1     | 0/1                | 0/1                 | 0/1                 |
| 325       | Female | F508del | F508del | 1     | 1/1                | 1/1                 | 0/1                 |
| 353       | Female | F508del | F508del | 1     | 0/1                | 0/1                 | 0/1                 |
| 371       | Male   | F508del | F508del | 1     | 0/1                | 0/1                 | 0/1                 |
| 374       | Male   | F508del | F508del | 1     | 0/1                | 0/1                 | 0/1                 |
| 377       | Male   | F508del | F508del | 1     | 1/1                | 1/1                 | 0/1                 |
| 383       | Female | F508del | F508del | 1     | 0/1                | 0/1                 | 0/1                 |
| 385       | Male   | F508del | F508del | 1     | 0/1                | 0/1                 | 0/1                 |
| 375       | Male   | F508del | F508del | 1     | 1/1                | 0/1                 | 0/1                 |
| 86        | Male   | F508del | F508del | 1     | 0/0                | 0/0                 | 0/1                 |
| 74        | Male   | F508del | F508del | 1     | 0/0                | 0/0                 | 0/1                 |
| 10        | Male   | F508del | F508del | 1     | 1/1                | 1/1                 | 0/0                 |
| 151       | Female | F508del | F508del | 1     | 1/1                | 1/1                 | 0/0                 |
| 35        | Male   | F508del | F508del | 1     | 1/1                | 1/1                 | 0/0                 |
| 41        | Male   | F508del | F508del | 1     | 1/1                | 1/1                 | 0/0                 |
| 42        | Female | F508del | F508del | 1     | 1/1                | 1/1                 | 0/0                 |
| 53        | Male   | F508del | F508del | 1     | 1/1                | 1/1                 | 0/0                 |
| 141       | Female | F508del | F508del | 1     | 0/1                | 0/1                 | 0/0                 |
| 193       | Female | F508del | F508del | 1     | 1/1                | 1/1                 | 0/0                 |
| 147       | Female | F508del | F508del | 1     | 1/1                | 1/1                 | 0/0                 |
| 228       | Female | F508del | F508del | 1     | 1/1                | 1/1                 | 0/0                 |
| 92        | Male   | F508del | F508del | 1     | 1/1                | 1/1                 | 0/0                 |
| 107       | Male   | F508del | F508del | 1     | 1/1                | 1/1                 | 0/0                 |
| 108       | Female | F508del | F508del | 1     | 1/1                | 1/1                 | 0/0                 |
| 112       | Male   | F508del | F508del | 1     | 1/1                | 1/1                 | 0/0                 |
| 243       | Male   | F508del | F508del | 1     | 1/1                | 1/1                 | 0/0                 |
| 247       | Female | F508del | F508del | 1     | 0/1                | 0/1                 | 0/0                 |
| 251       | Female | F508del | F508del | 1     | 0/1                | 0/1                 | 0/0                 |
| 252       | Female | F508del | F508del | 1     | 0/1                | 0/1                 | 0/0                 |

|     |        |         |                |   |     |     |     |
|-----|--------|---------|----------------|---|-----|-----|-----|
| 200 | Male   | F508del | F508del        | 1 | 1/1 | 1/1 | 0/0 |
| 285 | Female | F508del | F508del        | 1 | 1/1 | 1/1 | 0/0 |
| 290 | Female | F508del | F508del        | 1 | 1/1 | 1/1 | 0/0 |
| 229 | Female | F508del | F508del        | 1 | 1/1 | 1/1 | 0/0 |
| 264 | Male   | F508del | F508del        | 1 | 1/1 | 1/1 | 0/0 |
| 356 | Female | F508del | F508del        | 1 | 1/1 | 1/1 | 0/0 |
| 265 | Female | F508del | F508del        | 1 | 1/1 | 1/1 | 0/0 |
| 268 | Female | F508del | F508del        | 1 | 1/1 | 1/1 | 0/0 |
| 379 | Female | F508del | 1312A->G       | 2 | 0/1 | 0/1 | 1/1 |
| 148 | Female | F508del | 1471delA       | 2 | 0/1 | 0/1 | 0/1 |
| 363 | Male   | F508del | 1524+1delG     | 2 | 0/1 | 0/1 | 0/1 |
| 157 | Female | F508del | 1717-1G->A     | 2 | 0/1 | 0/1 | 0/1 |
| 184 | Female | F508del | 1717-1G->A     | 2 | 0/0 | 0/0 | 1/1 |
| 381 | Male   | F508del | 1717-1G->A     | 2 | 0/0 | 0/0 | 0/0 |
| 104 | Female | F508del | 1898+1G->C     | 2 | 0/0 | 0/0 | 1/1 |
| 256 | Male   | F508del | 1924del7       | 2 | 1/1 | 1/1 | 0/1 |
| 46  | Female | F508del | 2184insA       | 2 | 0/1 | 0/1 | 0/1 |
| 299 | Female | F508del | 2184insA       | 2 | 0/1 | 0/1 | 0/1 |
| 126 | Female | F508del | 2622+1G->A     | 2 | 0/1 | 0/1 | 0/1 |
| 234 | Female | F508del | 3120G->A       | 2 | 1/1 | 1/1 | 0/0 |
| 210 | Male   | F508del | 3272-26A->G    | 2 | 0/1 | 0/1 | 0/1 |
| 239 | Male   | F508del | 3849+10kbC->T  | 2 | 1/1 | 1/1 | 0/0 |
| 103 | Female | F508del | 3905insT       | 2 | 0/1 | 0/1 | 0/1 |
| 365 | Male   | F508del | 3905insT       | 2 | 1/1 | 1/1 | 0/1 |
| 138 | Male   | F508del | 3905insT       | 2 | 0/0 | 0/0 | 1/1 |
| 145 | Female | F508del | 621+1G->T      | 2 | 0/1 | 0/1 | 0/1 |
| 18  | Female | F508del | 621+1G->T      | 2 | 1/1 | 1/1 | 0/0 |
| 222 | Female | F508del | A455E          | 2 | 1/1 | 1/1 | 0/0 |
| 140 | Female | F508del | c.1210 -11T->G | 2 | 0/0 | 0/0 | 0/1 |
| 278 | Male   | F508del | c.40delAA      | 2 | 1/1 | 1/1 | 0/0 |
| 272 | Male   | F508del | E257X          | 2 | 0/1 | 0/1 | 0/1 |
| 169 | Male   | F508del | G542X          | 2 | 1/1 | 1/1 | 0/1 |
| 225 | Male   | F508del | G542X          | 2 | 0/0 | 0/0 | 1/1 |
| 61  | Female | F508del | G551D          | 2 | 0/1 | 0/1 | 0/1 |
| 269 | Male   | F508del | G551D          | 2 | 0/1 | 0/1 | 0/0 |
| 230 | Male   | F508del | L206W          | 2 | 0/0 | 0/0 | 1/1 |
| 177 | Male   | F508del | P67L           | 2 | 0/1 | 0/1 | 0/1 |
| 146 | Male   | F508del | Q1382X         | 2 | 1/1 | 1/1 | 0/0 |
| 66  | Female | F508del | Q372Q          | 2 | 0/1 | 0/1 | 0/1 |
| 262 | Female | F508del | R1158X         | 2 | 0/1 | 0/1 | 0/0 |

|     |        |               |             |   |     |     |     |
|-----|--------|---------------|-------------|---|-----|-----|-----|
| 77  | Male   | F508del       | R117H       | 2 | 0/1 | 0/1 | 0/1 |
| 288 | Male   | F508del       | R117H       | 2 | 0/1 | 0/1 | 0/0 |
| 254 | Male   | F508del       | R347H       | 2 | 0/1 | 0/1 | 0/1 |
| 180 | Male   | F508del       | R352Q       | 2 | 0/1 | 0/1 | 0/1 |
| 260 | Male   | F508del       | R560T       | 2 | 0/1 | 0/1 | 0/1 |
| 259 | Female | F508del       | T1246I      | 2 | 0/1 | 0/1 | 0/1 |
| 178 | Male   | F508del       | W1282X      | 2 | 0/1 | 0/1 | 0/1 |
| 38  | Male   | F508del       | W1282X      | 2 | 0/0 | 0/0 | 0/1 |
| 192 | Female | F508del       | W1282X      | 2 | 0/0 | 0/0 | 0/1 |
| 27  | Male   | F508del       | W1282X      | 2 | 0/1 | 0/1 | 0/0 |
| 232 | Female | G576A         | -741T->G    | 3 | 1/1 | 1/1 | 0/0 |
| 76  | Male   | 3849+10kbC->T | 2143delT    | 3 | 0/1 | 0/1 | 0/1 |
| 114 | Male   | 1078delT      | 2789+5G->A  | 3 | 1/1 | 1/1 | 0/0 |
| 302 | Female | I507del       | 2896insAG   | 3 | 0/1 | 0/1 | 0/1 |
| 253 | Female | Q98R          | 297-1G->A   | 3 | 0/1 | 0/1 | 0/1 |
| 338 | Male   | 2184delA      | 3272-26A->G | 3 | 1/1 | 1/1 | 0/0 |
| 1   | Female | R117H         | 621+1G->T   | 3 | 1/1 | 1/1 | 0/0 |
| 237 | Female | G551D         | 621+1G->T   | 3 | 0/1 | 0/1 | 0/0 |
| 328 | Female | R117H         | G551D       | 3 | 0/1 | 0/1 | 0/0 |
| 318 | Male   | W1282X        | L206W       | 3 | 0/1 | 0/1 | 0/0 |
| 344 | Male   | G542X         | R347P       | 3 | 0/1 | 0/1 | 0/1 |
