# Supplementary material for: Tensin 1 (TNS1) is a modifier gene for low body mass index (BMI) in homozygous [F508del]CFTR patients
Source: PubMed Central journal article supplement (PMC8176904; doi:10.14814/phy2.14886), 2021-06-04

Figure S11: Variance explained by PC1 to PC10

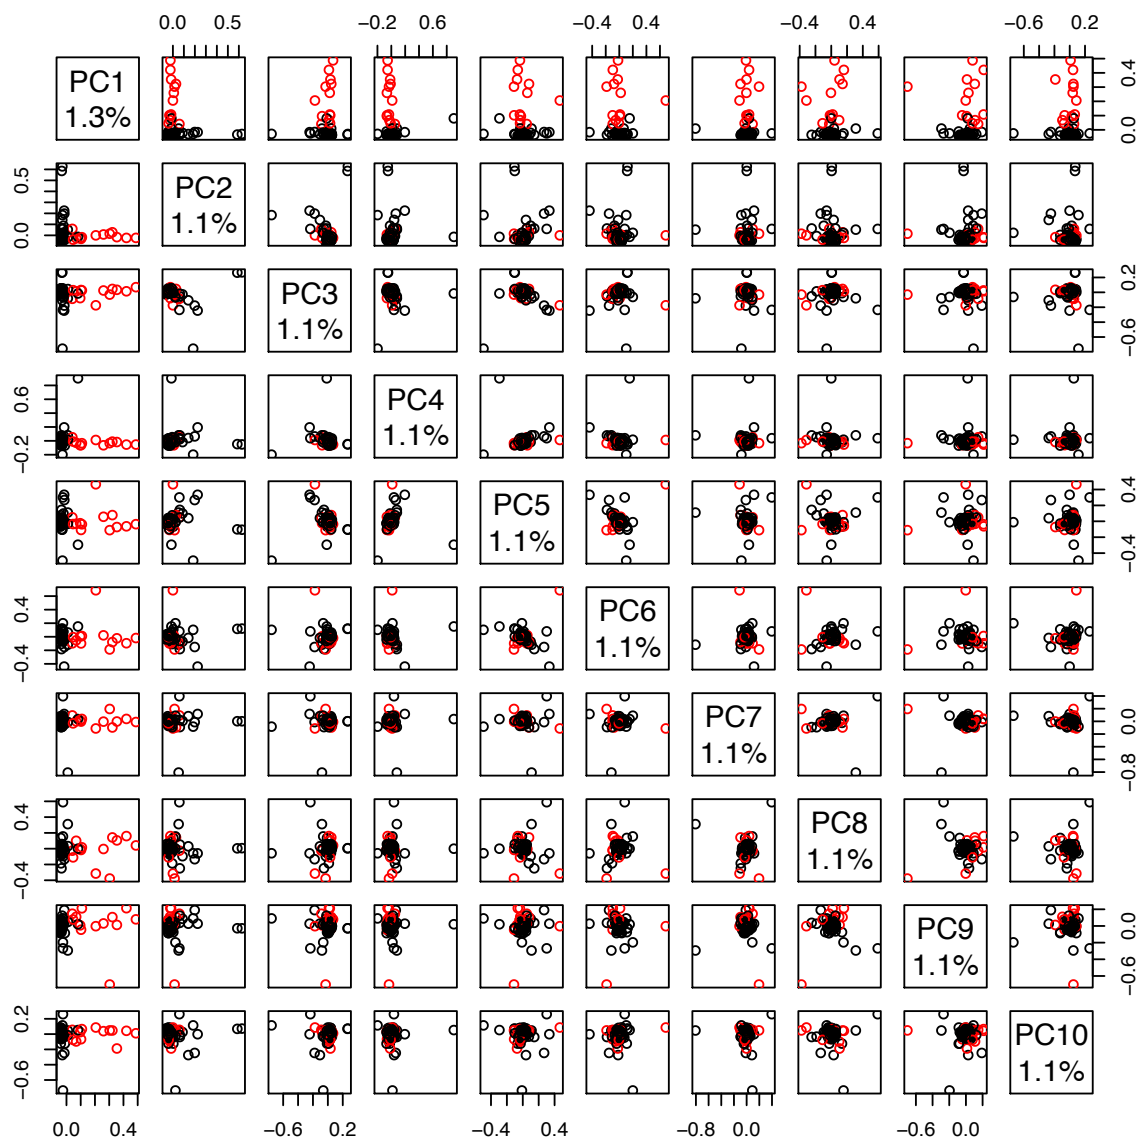

Supplement: PHY2-9-e14886-s003.pdf [file PHY2-9-e14886-s003.pdf]
