# Supplementary material for: Tensin 1 (TNS1) is a modifier gene for low body mass index (BMI) in homozygous [F508del]CFTR patients
Source: PubMed Central journal article supplement (PMC8176904; doi:10.14814/phy2.14886), 2021-06-04
Supplement: PHY2-9-e14886-s004.pdf [file PHY2-9-e14886-s004.pdf]

Table SI4: Phenotypic comparisons of CF cohort and their TNS1 genotype  
 BMI Comparison of TNS1 Genotypes

| CF Cohort n=87                                |  | TNS1 (rs918949)  | n1 | BMI  | Reference TNS1 (rs918949)  | n2 | P     |
|-----------------------------------------------|--|------------------|----|------|----------------------------|----|-------|
|                                               |  | C/C              | 11 | 23.6 | T/T                        | 38 | 0.16  |
|                                               |  | C/T              | 38 | 22.7 | C/C                        | 11 | 0.61  |
|                                               |  | T/T              | 38 | 22.0 | C/T                        | 38 | 0.3   |
| Homozygous [ <i>F508del</i> ] n=45            |  | TNS1 (rs918949)  | n1 | BMI  | Reference TNS1 (rs918949)  | n2 | P     |
|                                               |  | C/C              | 2  | 25.4 | T/T                        | 29 | NA    |
|                                               |  | C/T              | 14 | 23.0 | C/C                        | 2  | NA    |
|                                               |  | T/T              | 29 | 21.6 | C/T                        | 14 | 0.023 |
| Compound Heterozygous [ <i>F508del</i> ] n=42 |  | TNS1 (rs918949)  | n1 | BMI  | Reference TNS1 (rs918949)  | n2 | P     |
|                                               |  | C/C              | 9  | 23.2 | T/T                        | 9  | 0.63  |
|                                               |  | C/T              | 24 | 22.6 | C/C                        | 9  | 0.12  |
|                                               |  | T/T              | 9  | 23.1 | C/T                        | 24 | 0.12  |
| CF Cohort n=87                                |  | TNS1 (rs2571445) | n1 | BMI  | Reference TNS1 (rs2571445) | n2 | P     |
|                                               |  | A/A              | 11 | 23.6 | G/G                        | 37 | 0.16  |
|                                               |  | A/G              | 39 | 22.7 | A/A                        | 11 | 0.63  |
|                                               |  | G/G              | 37 | 21.9 | A/G                        | 39 | 0.32  |
| Homozygous [ <i>F508del</i> ] n=45            |  | TNS1 (rs2571445) | n1 | BMI  | Reference TNS1 (rs2571445) | n2 | P     |
|                                               |  | A/A              | 2  | 25.4 | G/G                        | 28 | NA    |
|                                               |  | A/G              | 15 | 23.0 | A/A                        | 2  | NA    |
|                                               |  | G/G              | 28 | 21.6 | A/G                        | 15 | 0.02  |
| Compound Heterozygous [ <i>F508del</i> ] n=42 |  | TNS1 (rs2571445) | n1 | BMI  | Reference TNS1 (rs2571445) | n2 | P     |
|                                               |  | A/A              | 9  | 23.2 | G/G                        | 9  | 0.63  |
|                                               |  | A/G              | 24 | 22.6 | A/A                        | 9  | 0.12  |
|                                               |  | G/G              | 9  | 23.1 | A/G                        | 24 | 0.12  |

ppFEV1 Comparison of TNS1 Genotypes

| CF Cohort n=87                                |    |        |                            |    |      |  |
|-----------------------------------------------|----|--------|----------------------------|----|------|--|
| TNS1 (rs918949)                               | n1 | ppFEV1 | Reference TNS1 (rs918949)  | n2 | P    |  |
| C/C                                           | 11 | 65.8   | T/T                        | 38 | 0.11 |  |
| C/T                                           | 38 | 61.7   | C/C                        | 11 | 0.43 |  |
| T/T                                           | 38 | 56     | C/T                        | 38 | 0.27 |  |
| Homozygous [ <i>F508del</i> ] n=45            |    |        |                            |    |      |  |
| TNS1 (rs918949)                               | n1 | ppFEV1 | Reference TNS1 (rs918949)  | n2 | P    |  |
| C/C                                           | 2  | 75.2   | T/T                        | 29 | NA   |  |
| C/T                                           | 14 | 60.4   | C/C                        | 2  | NA   |  |
| T/T                                           | 29 | 57.1   | C/T                        | 14 | 0.73 |  |
| Compound Heterozygous [ <i>F508del</i> ] n=42 |    |        |                            |    |      |  |
| TNS1 (rs918949)                               | n1 | ppFEV1 | Reference TNS1 (rs918949)  | n2 | P    |  |
| C/C                                           | 9  | 63.7   | T/T                        | 9  | 0.24 |  |
| C/T                                           | 24 | 62.5   | C/C                        | 9  | 0.31 |  |
| T/T                                           | 9  | 52.6   | C/T                        | 24 | 0.54 |  |
| CF Cohort n=87                                |    |        |                            |    |      |  |
| TNS1 (rs2571445)                              | n1 | ppFEV1 | Reference TNS1 (rs2571445) | n2 | P    |  |
| A/A                                           | 11 | 65.8   | G/G                        | 37 | 0.11 |  |
| A/G                                           | 39 | 62.4   | A/A                        | 11 | 0.48 |  |
| G/G                                           | 37 | 55.2   | A/G                        | 39 | 0.2  |  |
| Homozygous [ <i>F508del</i> ] n=45            |    |        |                            |    |      |  |
| TNS1 (rs2571445)                              | n1 | ppFEV1 | Reference TNS1 (rs2571445) | n2 | P    |  |
| A/A                                           | 2  | 75.2   | G/G                        | 28 | NA   |  |
| A/G                                           | 15 | 62.2   | A/A                        | 2  | NA   |  |
| G/G                                           | 28 | 56     | A/G                        | 15 | 0.73 |  |
| Compound Heterozygous [ <i>F508del</i> ] n=42 |    |        |                            |    |      |  |
| TNS1 (rs2571445)                              | n1 | ppFEV1 | Reference TNS1 (rs2571445) | n2 | P    |  |
| A/A                                           | 9  | 63.7   | G/G                        | 9  | 0.24 |  |
| A/G                                           | 24 | 62.5   | A/A                        | 9  | 0.54 |  |
| G/G                                           | 9  | 52.6   | A/G                        | 24 | 0.54 |  |

ppFVC Comparison of TNS1 Genotypes

| CF Cohort n=87                                |                  |    |       |                            |    |      |
|-----------------------------------------------|------------------|----|-------|----------------------------|----|------|
|                                               | TNS1 (rs918949)  | n1 | ppFVC | Reference TNS1 (rs918949)  | n2 | P    |
|                                               | C/C              | 11 | 86.2  | T/T                        | 38 | 0.07 |
|                                               | C/T              | 38 | 78.5  | C/C                        | 11 | 0.13 |
|                                               | T/T              | 38 | 74.5  | C/T                        | 38 | 0.59 |
| Homozygous [ <i>F508del</i> ] n=45            |                  |    |       |                            |    |      |
|                                               | TNS1 (rs918949)  | n1 | ppFVC | Reference TNS1 (rs918949)  | n2 | P    |
|                                               | C/C              | 2  | 100.2 | T/T                        | 29 | NA   |
|                                               | C/T              | 14 | 78.9  | C/C                        | 2  | NA   |
|                                               | T/T              | 29 | 76.3  | C/T                        | 14 | 0.85 |
| Compound Heterozygous [ <i>F508del</i> ] n=42 |                  |    |       |                            |    |      |
|                                               | TNS1 (rs918949)  | n1 | ppFVC | Reference TNS1 (rs918949)  | n2 |      |
|                                               | C/C              | 9  | 83.1  | T/T                        | 9  | 0.15 |
|                                               | C/T              | 24 | 78.3  | C/C                        | 9  | 0.74 |
|                                               | T/T              | 9  | 68.6  | C/T                        | 24 | 0.74 |
| CF Cohort n=87                                |                  |    |       |                            |    |      |
|                                               | TNS1 (rs2571445) | n1 | ppFVC | Reference TNS1 (rs2571445) | n2 | P    |
|                                               | A/A              | 11 | 86.2  | G/G                        | 37 | 0.07 |
|                                               | A/G              | 39 | 79.2  | A/A                        | 11 | 0.17 |
|                                               | G/G              | 37 | 73.6  | A/G                        | 39 | 0.43 |
| Homozygous [ <i>F508del</i> ] n=45            |                  |    |       |                            |    |      |
|                                               | TNS1 (rs2571445) | n1 | ppFVC | Reference TNS1 (rs2571445) | n2 | P    |
|                                               | A/A              | 2  | 100.2 | G/G                        | 28 | NA   |
|                                               | A/G              | 15 | 80.6  | A/A                        | 2  | NA   |
|                                               | G/G              | 28 | 75.2  | A/G                        | 15 | 0.77 |
| Compound Heterozygous [ <i>F508del</i> ] n=42 |                  |    |       |                            |    |      |
|                                               | TNS1 (rs2571445) | n1 | ppFVC | Reference TNS1 (rs2571445) | n2 | P    |
|                                               | A/A              | 9  | 83.1  | G/G                        | 9  | 0.15 |
|                                               | A/G              | 24 | 78.3  | A/A                        | 9  | 0.74 |
|                                               | G/G              | 9  | 68.6  | A/G                        | 24 | 0.74 |

## Sex Comparison of TNS1 Genotypes

| CF Cohort n=87                                |  | TNS1 (rs918949)  | n1 | Sex (M/F) | Reference TNS1 (rs918949)  | n2 | P    |
|-----------------------------------------------|--|------------------|----|-----------|----------------------------|----|------|
|                                               |  | C/C              | 11 | 7/4       | T/T                        | 38 | 0.34 |
|                                               |  | C/T              | 38 | 18/20     | C/C                        | 11 | 0.31 |
|                                               |  | T/T              | 38 | 19/19     | C/T                        | 38 | 0.74 |
| Homozygous [ <i>F508del</i> ] n=45            |  | TNS1 (rs918949)  | n1 | Sex (M/F) | Reference TNS1 (rs918949)  | n2 | P    |
|                                               |  | C/C              | 2  | 2/0       | T/T                        | 29 | NA   |
|                                               |  | C/T              | 14 | 6/8       | C/C                        | 2  | NA   |
|                                               |  | T/T              | 29 | 13/16     | C/T                        | 14 | 0.83 |
| Compound Heterozygous [ <i>F508del</i> ] n=42 |  | TNS1 (rs918949)  | n1 | Sex (M/F) | Reference TNS1 (rs918949)  | n2 | P    |
|                                               |  | C/C              | 9  | 5/4       | T/T                        | 9  | 0.98 |
|                                               |  | C/T              | 24 | 12/12     | C/C                        | 9  | 0.73 |
|                                               |  | T/T              | 9  | 6/3       | C/T                        | 24 | 0.73 |
| CF Cohort n=87                                |  | TNS1 (rs2571445) | n1 | Sex (M/F) | Reference TNS1 (rs2571445) | n2 | P    |
|                                               |  | A/A              | 11 | 7/4       | G/G                        | 37 | 0.34 |
|                                               |  | A/G              | 39 | 19/20     | A/A                        | 11 | 0.37 |
|                                               |  | G/G              | 37 | 19/19     | A/G                        | 39 | 0.99 |
| Homozygous [ <i>F508del</i> ] n=45            |  | TNS1 (rs2571445) | n1 | Sex (M/F) | Reference TNS1 (rs2571445) | n2 | P    |
|                                               |  | A/A              | 2  | 2/0       | G/G                        | 28 | NA   |
|                                               |  | A/G              | 15 | 7/8       | A/A                        | 2  | NA   |
|                                               |  | G/G              | 28 | 12/16     | A/G                        | 15 | 0.78 |
| Compound Heterozygous [ <i>F508del</i> ] n=42 |  | TNS1 (rs2571445) | n1 | Sex (M/F) | Reference TNS1 (rs2571445) | n2 | P    |
|                                               |  | A/A              | 9  | 5/4       | G/G                        | 9  | 0.98 |
|                                               |  | A/G              | 24 | 12/12     | A/A                        | 9  | 0.73 |
|                                               |  | G/G              | 9  | 6/3       | A/G                        | 24 | 0.73 |

## CF Related Diabetes Comparison of TNS1 Genotypes

| CF Cohort n=87                                |  | TNS1 (rs918949)  | n1 | Diabetes (Y/N) | Reference TNS1 (rs918949)  | n2 | P    |
|-----------------------------------------------|--|------------------|----|----------------|----------------------------|----|------|
|                                               |  | C/C              | 11 | 2/9            | T/T                        | 38 | 0.12 |
|                                               |  | C/T              | 38 | 9/29           | C/C                        | 11 | 0.83 |
|                                               |  | T/T              | 38 | 16/22          | C/T                        | 38 | 0.11 |
| Homozygous [ <i>F508del</i> ] n=45            |  | TNS1 (rs918949)  | n1 | Diabetes (Y/N) | Reference TNS1 (rs918949)  | n2 | P    |
|                                               |  | C/C              | 2  | 1/1            | T/T                        | 29 | NA   |
|                                               |  | C/T              | 14 | 6/8            | C/C                        | 2  | NA   |
|                                               |  | T/T              | 29 | 13/16          | C/T                        | 14 | 0.87 |
| Compound Heterozygous [ <i>F508del</i> ] n=42 |  | TNS1 (rs918949)  | n1 | Diabetes (Y/N) | Reference TNS1 (rs918949)  | n2 | P    |
|                                               |  | C/C              | 9  | 1/8            | T/T                        | 9  | 0.53 |
|                                               |  | C/T              | 24 | 3/21           | C/C                        | 9  | 0.37 |
|                                               |  | T/T              | 9  | 3/6            | C/T                        | 24 | 0.37 |
| CF Cohort n=87                                |  | TNS1 (rs2571445) | n1 | Diabetes (Y/N) | Reference TNS1 (rs2571445) | n2 | P    |
|                                               |  | A/A              | 11 | 2/9            | G/G                        | 37 | 0.12 |
|                                               |  | A/G              | 39 | 9/30           | A/A                        | 11 | 0.87 |
|                                               |  | G/G              | 37 | 16/21          | A/G                        | 39 | 0.08 |
| Homozygous [ <i>F508del</i> ] n=45            |  | TNS1 (rs2571445) | n1 | Diabetes (Y/N) | Reference TNS1 (rs2571445) | n2 | P    |
|                                               |  | A/A              | 2  | 1/1            | G/G                        | 28 | NA   |
|                                               |  | A/G              | 15 | 6/9            | A/A                        | 2  | NA   |
|                                               |  | G/G              | 28 | 13/15          | A/G                        | 15 | 0.72 |
| Compound Heterozygous [ <i>F508del</i> ] n=42 |  | TNS1 (rs2571445) | n1 | Diabetes (Y/N) | Reference TNS1 (rs2571445) | n2 | P    |
|                                               |  | A/A              | 9  | 1/8            | G/G                        | 9  | 0.53 |
|                                               |  | A/G              | 24 | 3/21           | A/A                        | 9  | 0.37 |
|                                               |  | G/G              | 9  | 3/6            | A/G                        | 24 | 0.37 |

## Pancreatic Sufficiency Comparison of TNS1 Genotypes

| CF Cohort n=87                                |  | TNS1 (rs918949)  | n1 | Pancreatic Sufficiency (PI/PS) | Reference TNS1 (rs918949)  | n2 | P    |
|-----------------------------------------------|--|------------------|----|--------------------------------|----------------------------|----|------|
|                                               |  | C/C              | 11 | 8/3                            | T/T                        | 38 | 0.21 |
|                                               |  | C/T              | 38 | 30/8                           | C/C                        | 11 | 0.33 |
|                                               |  | T/T              | 38 | 33/5                           | C/T                        | 38 | 0.54 |
| Homozygous [ <i>F508del</i> ] n=45            |  | TNS1 (rs918949)  | n1 | Pancreatic Sufficiency (PI/PS) | Reference TNS1 (rs918949)  | n2 | P    |
|                                               |  | C/C              | 2  | 1/1                            | T/T                        | 29 | NA   |
|                                               |  | C/T              | 14 | 13/1                           | C/C                        | 2  | NA   |
|                                               |  | T/T              | 29 | 27/2                           | C/T                        | 14 | 0.9  |
| Compound Heterozygous [ <i>F508del</i> ] n=42 |  | TNS1 (rs918949)  | n1 | Pancreatic Sufficiency (PI/PS) | Reference TNS1 (rs918949)  | n2 | P    |
|                                               |  | C/C              | 9  | 7/2                            | T/T                        | 9  | 0.31 |
|                                               |  | C/T              | 24 | 17/7                           | C/C                        | 9  | 0.49 |
|                                               |  | T/T              | 9  | 6/3                            | C/T                        | 24 | 0.49 |
| CF Cohort n=87                                |  | TNS1 (rs2571445) | n1 | Pancreatic Sufficiency (PI/PS) | Reference TNS1 (rs2571445) | n2 | P    |
|                                               |  | A/A              | 11 | 8/3                            | G/G                        | 37 | 0.21 |
|                                               |  | A/G              | 39 | 31/8                           | A/A                        | 11 | 0.32 |
|                                               |  | G/G              | 37 | 32/5                           | A/G                        | 39 | 0.55 |
| Homozygous [ <i>F508del</i> ] n=45            |  | TNS1 (rs2571445) | n1 | Pancreatic Sufficiency (PI/PS) | Reference TNS1 (rs2571445) | n2 | P    |
|                                               |  | A/A              | 2  | 1/1                            | G/G                        | 28 | NA   |
|                                               |  | A/G              | 15 | 14/1                           | A/A                        | 2  | NA   |
|                                               |  | G/G              | 28 | 26/2                           | A/G                        | 15 | 0.89 |
| Compound Heterozygous [ <i>F508del</i> ] n=42 |  | TNS1 (rs2571445) | n1 | Pancreatic Sufficiency (PI/PS) | Reference TNS1 (rs2571445) | n2 | P    |
|                                               |  | A/A              | 9  | 7/2                            | G/G                        | 9  | 0.31 |
|                                               |  | A/G              | 24 | 17/7                           | A/A                        | 9  | 0.49 |
|                                               |  | G/G              | 9  | 6/3                            | A/G                        | 24 | 0.49 |
