# Supplementary material for: Tensin 1 (TNS1) is a modifier gene for low body mass index (BMI) in homozygous [F508del]CFTR patients
Source: PubMed Central journal article supplement (PMC8176904; doi:10.14814/phy2.14886), 2021-06-04
Supplement: PHY2-9-e14886-s005.pdf [file PHY2-9-e14886-s005.pdf]

Table S13: Association Results with *p*-values less than or equal to 0.05

| CHROM | POS       | GENE         | SNP         | REF  | ALT | AF        | PVALUE     | FDR        |
|-------|-----------|--------------|-------------|------|-----|-----------|------------|------------|
| chr7  | 117199644 | CFTR         | rs113993960 | ATCT | A   | 0.758621  | 7.56E-19   | 1.30E-14   |
| chr2  | 218674697 | TNS1         | rs918949    | C    | T   | 0.655172  | 3.46E-06   | 0.02037369 |
| chr7  | 117199533 | CFTR         | rs213950    | G    | A   | 0.91954   | 3.55E-06   | 0.02037369 |
| chr2  | 218683154 | TNS1         | rs2571445   | A    | G   | 0.649425  | 5.80E-06   | 0.0249629  |
| chr2  | 218695102 | TNS1         | rs3796028   | G    | A   | 0.321839  | 2.32E-05   | 0.07986    |
| chr17 | 67125840  | ABCA6        | rs4968839   | C    | T   | 0.683908  | 0.00013489 | 0.38711182 |
| chr19 | 12256912  | ZNF625       | rs7258368   | C    | T   | 0.166667  | 0.00020835 | 0.39710458 |
| chr5  | 140626627 | PCDHB15      | rs618096    | G    | A   | 0.568966  | 0.00022649 | 0.39710458 |
| chr17 | 67081830  | ABCA6        | rs2302134   | T    | C   | 0.643678  | 0.00024798 | 0.39710458 |
| chr2  | 15607842  | NBAS         | rs4668909   | T    | C   | 0.66092   | 0.00028231 | 0.39710458 |
| chr13 | 25487103  | CENPJ        | rs35498994  | T    | C   | 0.103448  | 0.00028729 | 0.39710458 |
| chr19 | 52660279  | ZNF836       | rs1366245   | C    | T   | 0.201149  | 0.00029388 | 0.39710458 |
| chr17 | 33433487  | RAD51L3      | rs4796033   | C    | T   | 0.178161  | 0.00033559 | 0.39710458 |
| chr17 | 33433487  | RAD51L3-RFFL | rs4796033   | C    | T   | 0.178161  | 0.00033559 | 0.39710458 |
| chr15 | 90344352  | ANPEP        | rs8192297   | T    | C   | 0.166667  | 0.00038191 | 0.39710458 |
| chr5  | 140573754 | PCDHB10      | rs702386    | A    | C   | 0.586207  | 0.00039872 | 0.39710458 |
| chr17 | 39661366  | KRT13        | rs760134    | G    | C   | 0.0747126 | 0.00041548 | 0.39710458 |
| chr9  | 112082510 | EPB41L4B     | rs117569740 | C    | T   | 0.16092   | 0.00042346 | 0.39710458 |
| chr1  | 117311147 | CD2          | rs699738    | C    | A   | 0.12069   | 0.00043818 | 0.39710458 |
| chr13 | 25428002  | RNF17        | rs3783082   | C    | A   | 0.114943  | 0.00049825 | 0.42896834 |
| chr15 | 78882925  | CHRNA5       | rs16969968  | G    | A   | 0.344828  | 0.00066096 | 0.44785779 |
| chr19 | 18272190  | PIK3R2       | rs2241088   | A    | C   | 0.87931   | 0.0006998  | 0.44785779 |
| chr17 | 67178316  | ABCA10       | rs4968849   | A    | G   | 0.718391  | 0.0007513  | 0.44785779 |
| chr5  | 140531746 | PCDHB6       | rs246703    | C    | G   | 0.597701  | 0.00075641 | 0.44785779 |
| chr11 | 65810045  | GAL3ST3      | rs4565902   | T    | G   | 0.149425  | 0.00077116 | 0.44785779 |
| chr5  | 140553581 | PCDHB7       | rs2910313   | G    | C   | 0.591954  | 0.00079079 | 0.44785779 |
| chr7  | 73097654  | DNAJC30      | rs1128349   | C    | T   | 0.413793  | 0.00079846 | 0.44785779 |
| chr3  | 138289221 | CEP70        | rs1673607   | C    | T   | 0.528736  | 0.00081621 | 0.44785779 |

|       |           |          |             |      |    |           |            |            |
|-------|-----------|----------|-------------|------|----|-----------|------------|------------|
| chr2  | 15674686  | NBAS     | rs13029846  | T    | C  | 0.649425  | 0.00084983 | 0.44785779 |
| chr2  | 220037756 | CNPPD1   | rs1043160   | A    | G  | 0.609195  | 0.00086378 | 0.44785779 |
| chr2  | 220037666 | CNPPD1   | rs1127102   | A    | G  | 0.603448  | 0.0008818  | 0.44785779 |
| chr5  | 140559914 | PCDH8    | rs2740583   | T    | C  | 0.344828  | 0.00092724 | 0.44785779 |
| chr17 | 67212423  | ABCA10   | rs9909216   | G    | A  | 0.649425  | 0.00093637 | 0.44785779 |
| chr1  | 54605318  | CDCP2    | rs3841798   | T    | TG | 0.183908  | 0.00095516 | 0.44785779 |
| chr1  | 54605318  | CDCP2    | rs76608277  | T    | TG | 0.183908  | 0.00095516 | 0.44785779 |
| chr15 | 59499179  | LDHAL6B  | rs3809530   | G    | A  | 0.304598  | 0.00100301 | 0.44785779 |
| chr15 | 59500116  | LDHAL6B  | rs3825937   | T    | C  | 0.304598  | 0.00100301 | 0.44785779 |
| chr12 | 50189602  | NCKAP5L  | rs3813526   | A    | G  | 0.0632184 | 0.00102124 | 0.44785779 |
| chr12 | 50190667  | NCKAP5L  | rs3741554   | A    | T  | 0.0632184 | 0.00102124 | 0.44785779 |
| chr7  | 88424115  | C7orf62  | rs2373396   | C    | G  | 0.16092   | 0.00102222 | 0.44785779 |
| chr9  | 71851877  | TJP2     | rs34774441  | G    | A  | 0.0689655 | 0.0010476  | 0.44785779 |
| chr12 | 117175608 | C12orf49 | rs73220422  | C    | T  | 0.0574713 | 0.00106639 | 0.44785779 |
| chr1  | 16389026  | FAM131C  | rs2863458   | T    | C  | 0.327586  | 0.00109854 | 0.45037524 |
| chr12 | 104153004 | STAB2    | rs2271637   | C    | G  | 0.298851  | 0.00121591 | 0.45084837 |
| chr1  | 242035438 | EXO1     | rs4149965   | G    | A  | 0.224138  | 0.00122388 | 0.45084837 |
| chr1  | 179504025 | AXDND1   | rs141228272 | AAAG | A  | 0.344828  | 0.00123058 | 0.45084837 |
| chr1  | 179504043 | AXDND1   | rs6658180   | C    | G  | 0.344828  | 0.00123058 | 0.45084837 |
| chr19 | 12222861  | ZNF788   | rs1975349   | T    | C  | 0.206897  | 0.00123061 | 0.45084837 |
| chr17 | 73498483  | CASKIN2  | rs7503373   | T    | C  | 0.885057  | 0.00132707 | 0.45559242 |
| chr19 | 6156483   | ACSBG2   | rs4807840   | T    | C  | 0.672414  | 0.00135098 | 0.45559242 |
| chr19 | 52033206  | SIGLEC6  | rs2005199   | G    | A  | 0.0747126 | 0.00135747 | 0.45559242 |
| chr2  | 197990741 | ANKRD44  | rs35338671  | A    | C  | 0.0632184 | 0.00139056 | 0.45559242 |
| chr16 | 89167094  | ACSF3    | rs7188200   | T    | C  | 0.741379  | 0.00141273 | 0.45559242 |
| chr19 | 43699417  | PSG4     | rs3859474   | A    | G  | 0.454023  | 0.00141525 | 0.45559242 |
| chr11 | 126081403 | RPUSD4   | rs2282580   | T    | C  | 0.385057  | 0.00142877 | 0.45559242 |
| chr2  | 218669225 | TNS1     | rs61741262  | T    | C  | 0.114943  | 0.00147255 | 0.46101524 |
| chr16 | 11367154  | PRM3     | rs429744    | C    | T  | 0.942529  | 0.00160311 | 0.47028583 |
| chr1  | 19186129  | TAS1R2   | rs9701796   | G    | C  | 0.735632  | 0.00160574 | 0.47028583 |
| chr16 | 72991715  | ZFH3     | rs4788682   | A    | G  | 0.833333  | 0.00161191 | 0.47028583 |

|       |           |          |             |   |        |           |            |            |
|-------|-----------|----------|-------------|---|--------|-----------|------------|------------|
| chr17 | 41246481  | BRCA1    | rs1799950   | T | C      | 0.0689655 | 0.00164538 | 0.47028583 |
| chr12 | 50232169  | BCDIN3D  | rs11169172  | A | T      | 0.0804598 | 0.0017388  | 0.47028583 |
| chr13 | 113053470 | SPACA7   | rs10816     | T | A      | 0.649425  | 0.00175462 | 0.47028583 |
| chr1  | 38185723  | EPHA10   | rs6670599   | C | T      | 0.091954  | 0.00178442 | 0.47028583 |
| chr1  | 38188740  | EPHA10   | rs12405650  | C | T      | 0.091954  | 0.00178442 | 0.47028583 |
| chr1  | 38188787  | EPHA10   | rs17511304  | A | G      | 0.091954  | 0.00178442 | 0.47028583 |
| chr19 | 43763144  | PSG9     | rs2355447   | C | T      | 0.0747126 | 0.0017955  | 0.47028583 |
| chr2  | 201354935 | KCTD18   | rs3795969   | C | G      | 0.431034  | 0.00182225 | 0.47028583 |
| chr1  | 170521376 | GORAB    | rs913257    | G | A      | 0.396552  | 0.00183483 | 0.47028583 |
| chr20 | 61512185  | DIDO1    | rs41282984  | G | C      | 0.0689655 | 0.00186162 | 0.47028583 |
| chr2  | 232457880 | C2orf57  | rs74460533  | T | C      | 0.0574713 | 0.00188453 | 0.47028583 |
| chr1  | 110766454 | KCNC4    | rs59123361  | G | A      | 0.137931  | 0.0020379  | 0.48286381 |
| chr1  | 27339103  | FAM46B   | rs4970471   | G | T      | 0.183908  | 0.0020653  | 0.48286381 |
| chr1  | 113098534 | ST7L     | rs6658555   | C | T      | 0.252874  | 0.00209003 | 0.48286381 |
| chr9  | 114462322 | C9orf84  | rs6477845   | A | G      | 0.787356  | 0.00212269 | 0.48286381 |
| chr9  | 114464487 | C9orf84  | rs1407390   | T | C      | 0.787356  | 0.00212269 | 0.48286381 |
| chr9  | 114490308 | C9orf84  | rs7470491   | T | C      | 0.787356  | 0.00212269 | 0.48286381 |
| chr16 | 840378    | CHTF18   | rs3765263   | A | G      | 0.241379  | 0.00213123 | 0.48286381 |
| chr20 | 62422080  | ZBTB46   | rs2281929   | T | C      | 0.091954  | 0.00216343 | 0.48327802 |
| chr1  | 152882610 | IVL      | rs2229496   | A | G      | 0.126437  | 0.00221776 | 0.48327802 |
| chr1  | 152883711 | IVL      | rs7545520   | G | C      | 0.126437  | 0.00221776 | 0.48327802 |
| chr17 | 60741917  | MRC2     | rs2014055   | G | A      | 0.12069   | 0.00229243 | 0.48327802 |
| chr6  | 27216699  | PRSS16   | rs5030965   | G | T      | 0.0517241 | 0.00229374 | 0.48327802 |
| chr6  | 32548632  | HLA-DRB1 | rs1136881   | T | A      | 0.218391  | 0.00230972 | 0.48327802 |
| chr5  | 129521126 | CHSY3    | rs2015018   | A | G      | 0.735632  | 0.00236412 | 0.48327802 |
| chr2  | 30975961  | CAPN13   | rs62142192  | G | T      | 0.155172  | 0.00245862 | 0.48327802 |
| chr11 | 56000403  | OR5T2    | rs10791893  | C | G      | 0.91954   | 0.00246349 | 0.48327802 |
| chr19 | 8808900   | ACTL9    | rs10410943  | A | G      | 0.735632  | 0.0024811  | 0.48327802 |
| chr19 | 8808942   | ACTL9    | rs2340550   | A | G      | 0.735632  | 0.0024811  | 0.48327802 |
| chr19 | 9236698   | OR7G3    | rs111279560 | G | GATGGT | 0.321839  | 0.00252577 | 0.48327802 |
| chr19 | 9237542   | OR7G3    | rs10414255  | T | C      | 0.321839  | 0.00252577 | 0.48327802 |

|       |           |          |            |   |   |           |            |            |
|-------|-----------|----------|------------|---|---|-----------|------------|------------|
| chr14 | 23744932  | HOMEZ    | rs1055061  | C | T | 0.0689655 | 0.00252599 | 0.48327802 |
| chr1  | 209950760 | TRAF3IP3 | rs669694   | C | G | 0.793103  | 0.002613   | 0.49443129 |
| chr3  | 97983265  | OR5H6    | rs4241472  | C | A | 0.0977011 | 0.00268509 | 0.50254962 |
| chr12 | 7249598   | C1RL     | rs3742089  | T | C | 0.454023  | 0.00279676 | 0.50910433 |
| chr19 | 56373462  | NLRP4    | rs12462372 | G | A | 0.0977011 | 0.00279909 | 0.50910433 |
| chrX  | 151821277 | GABRQ    | rs3810651  | T | A | 0.511494  | 0.00284751 | 0.50910433 |
| chr5  | 35037115  | AGXT2    | rs37369    | C | T | 0.155172  | 0.00286978 | 0.50910433 |
| chr3  | 10302056  | TATDN2   | rs2241314  | A | G | 0.109195  | 0.00289537 | 0.50910433 |
| chr15 | 59499228  | LDHAL6B  | rs3809529  | C | T | 0.333333  | 0.00289751 | 0.50910433 |
| chr1  | 6693097   | THAP3    | rs3174820  | A | G | 0.344828  | 0.00298352 | 0.51564659 |
| chr19 | 12384580  | ZNF44    | rs11879168 | T | C | 0.235632  | 0.00300828 | 0.51564659 |
| chr7  | 6193521   | USP42    | rs61729726 | G | C | 0.252874  | 0.00302881 | 0.51564659 |
| chr2  | 220046975 | FAM134A  | rs3731900  | C | A | 0.643678  | 0.00305453 | 0.51564659 |
| chr6  | 90039670  | UBE2J1   | rs10502    | G | C | 0.385057  | 0.00313923 | 0.52183409 |
| chr11 | 56143977  | OR8U1    | rs12272403 | A | G | 0.287356  | 0.00318173 | 0.52183409 |
| chr9  | 86258685  | C9orf103 | rs1052690  | A | C | 0.155172  | 0.0031821  | 0.52183409 |
| chr17 | 80789468  | ZNF750   | rs35653278 | G | A | 0.091954  | 0.00325388 | 0.52857132 |
| chr19 | 45854919  | ERCC2    | rs13181    | T | G | 0.33908   | 0.00335982 | 0.54067982 |
| chr10 | 73434888  | CDH23    | rs1227049  | G | C | 0.149425  | 0.00361299 | 0.56693036 |
| chr7  | 50180972  | C7orf72  | rs1456908  | C | T | 0.471264  | 0.00363875 | 0.56693036 |
| chr12 | 49308284  | CCDC65   | rs10747556 | A | G | 0.367816  | 0.00367444 | 0.56693036 |
| chr12 | 49314994  | CCDC65   | rs4760600  | A | G | 0.367816  | 0.00367444 | 0.56693036 |
| chr3  | 45869972  | LZTFL1   | rs1129183  | C | T | 0.114943  | 0.00372221 | 0.56693036 |
| chr19 | 45029208  | CEACAM20 | rs10408247 | G | A | 0.091954  | 0.00374382 | 0.56693036 |
| chr19 | 6156510   | ACSBG2   | rs33937754 | A | G | 0.178161  | 0.00386553 | 0.56693036 |
| chr11 | 60059810  | MS4A4A   | rs10750931 | A | G | 0.178161  | 0.00388928 | 0.56693036 |
| chr12 | 57390038  | GPR182   | rs35493121 | T | C | 0.0804598 | 0.00395611 | 0.56693036 |
| chr12 | 57422934  | MYO1A    | rs17119344 | G | A | 0.0804598 | 0.00395611 | 0.56693036 |
| chr4  | 17660082  | FAM184B  | rs1860596  | C | T | 0.672414  | 0.00395629 | 0.56693036 |
| chr11 | 63072184  | SLC22A10 | rs72926329 | C | T | 0.0862069 | 0.00407089 | 0.56693036 |
| chr4  | 17643848  | FAM184B  | rs2286771  | G | A | 0.666667  | 0.00411216 | 0.56693036 |

|       |           |          |             |   |      |           |            |            |
|-------|-----------|----------|-------------|---|------|-----------|------------|------------|
| chr6  | 32609806  | HLA-DQA1 | rs707952    | C | T    | 0.270115  | 0.00414707 | 0.56693036 |
| chr10 | 115405615 | NRAP     | rs3127106   | T | C    | 0.626437  | 0.00416055 | 0.56693036 |
| chr10 | 115405664 | NRAP     | rs3121478   | C | T    | 0.626437  | 0.00416055 | 0.56693036 |
| chr8  | 81733727  | ZNF704   | rs3907424   | C | A    | 0.143678  | 0.00420517 | 0.56693036 |
| chr5  | 35039486  | AGXT2    | rs37370     | C | T    | 0.83908   | 0.00421999 | 0.56693036 |
| chr1  | 55248074  | TTC22    | rs12144325  | A | G    | 0.126437  | 0.00425076 | 0.56693036 |
| chr19 | 10961024  | C19orf38 | rs73009507  | C | G    | 0.0689655 | 0.00427109 | 0.56693036 |
| chr4  | 159836336 | C4orf45  | rs78052401  | G | A    | 0.0517241 | 0.00427664 | 0.56693036 |
| chr4  | 159780252 | FNIP2    | rs148251675 | T | C    | 0.0517241 | 0.00427664 | 0.56693036 |
| chr16 | 88804734  | FAM38A   | rs7184427   | A | G    | 0.896552  | 0.00430843 | 0.56693036 |
| chr18 | 56338792  | MALT1    | rs56142402  | G | A    | 0.0862069 | 0.00431701 | 0.56693036 |
| chr11 | 6524072   | DNHD1    | rs11605196  | A | C    | 0.218391  | 0.00434606 | 0.56693036 |
| chr5  | 176316559 | HK3      | rs61749653  | C | T    | 0.0517241 | 0.0044251  | 0.56839159 |
| chr1  | 169391154 | C1orf114 | rs3820059   | A | G    | 0.66092   | 0.00444598 | 0.56839159 |
| chr13 | 53422553  | PCDH8    | rs3742301   | A | G    | 0.166667  | 0.00446622 | 0.56839159 |
| chr6  | 32610009  | HLA-DQA1 | rs2308891   | C | A    | 0.258621  | 0.0044893  | 0.56839159 |
| chr16 | 709001    | WDR90    | rs4984906   | C | A    | 0.396552  | 0.00457616 | 0.56850421 |
| chr1  | 173472465 | SLC9A11  | rs72709309  | G | A    | 0.0517241 | 0.00459557 | 0.56850421 |
| chr6  | 1612017   | FOXC1    | rs398123612 | A | ACGG | 0.258621  | 0.00463856 | 0.56850421 |
| chr6  | 1612017   | FOXC1    | rs755049427 | A | ACGG | 0.258621  | 0.00463856 | 0.56850421 |
| chr6  | 1612017   | HCG18    | rs398123612 | A | ACGG | 0.258621  | 0.00463856 | 0.56850421 |
| chr6  | 1612017   | HCG18    | rs755049427 | A | ACGG | 0.258621  | 0.00463856 | 0.56850421 |
| chr19 | 6312290   | ACER1    | rs72981971  | T | C    | 0.137931  | 0.00465527 | 0.56850421 |
| chr1  | 228528563 | OBSCN    | rs1188710   | C | G    | 0.534483  | 0.00471287 | 0.57108078 |
| chr4  | 89319296  | HERC6    | rs17014118  | T | C    | 0.16092   | 0.0047427  | 0.57108078 |
| chr10 | 94695617  | EXOC6    | rs1326331   | C | T    | 0.678161  | 0.00483042 | 0.57760418 |
| chr19 | 45021210  | CEACAM20 | rs10414398  | G | A    | 0.0804598 | 0.00489307 | 0.58096906 |
| chr7  | 128119514 | METTL2B  | rs1065267   | G | A    | 0.241379  | 0.00492604 | 0.58096906 |
| chr11 | 7509566   | OLFML1   | rs12805648  | A | T    | 0.149425  | 0.0050061  | 0.58285617 |
| chr2  | 201355106 | KCTD18   | rs13018579  | G | A    | 0.178161  | 0.00500974 | 0.58285617 |
| chr14 | 78184566  | SNW1     | rs176960    | C | A    | 0.87931   | 0.00521083 | 0.58557699 |

|       |           |           |            |   |   |           |            |            |
|-------|-----------|-----------|------------|---|---|-----------|------------|------------|
| chr6  | 44141088  | CAPN11    | rs6938938  | G | A | 0.0689655 | 0.00522915 | 0.58557699 |
| chr16 | 20802172  | ERI2      | rs2301770  | C | T | 0.0517241 | 0.00523108 | 0.58557699 |
| chr4  | 84230619  | HPSE      | rs11099592 | T | C | 0.781609  | 0.00528825 | 0.58557699 |
| chr2  | 220100787 | ANKZF1    | rs2293079  | C | T | 0.091954  | 0.00529511 | 0.58557699 |
| chr21 | 45945648  | TSPEAR    | rs35028190 | G | C | 0.0517241 | 0.00537675 | 0.58557699 |
| chr1  | 248129240 | OR2AK2    | rs4478844  | G | A | 0.603448  | 0.00538225 | 0.58557699 |
| chr1  | 228494790 | OBSCN     | rs435776   | G | A | 0.488506  | 0.0053908  | 0.58557699 |
| chr1  | 228504670 | OBSCN     | rs11810627 | C | T | 0.488506  | 0.0053908  | 0.58557699 |
| chr17 | 47210506  | B4GALNT2  | rs7207403  | C | A | 0.603448  | 0.00540794 | 0.58557699 |
| chr3  | 124627024 | MUC13     | rs1127233  | T | G | 0.241379  | 0.00543914 | 0.58557699 |
| chr17 | 41361960  | NBR1      | rs8482     | A | G | 0.344828  | 0.00545621 | 0.58557699 |
| chr10 | 24908686  | ARHGAP21  | rs3748222  | T | C | 0.517241  | 0.00549967 | 0.58557699 |
| chr10 | 96954360  | C10orf129 | rs11188225 | T | A | 0.350575  | 0.00554201 | 0.58557699 |
| chr3  | 97983391  | OR5H6     | rs2173236  | C | G | 0.155172  | 0.00554324 | 0.58557699 |
| chr3  | 97983391  | OR5H6     | rs2173236  | C | T | 0.557471  | 0.0332514  | 0.72203796 |
| chr6  | 167754661 | TLL2      | rs909545   | A | G | 0.781609  | 0.00563395 | 0.58616598 |
| chr17 | 10355371  | MYH4      | rs11651295 | C | T | 0.333333  | 0.00567678 | 0.58616598 |
| chr16 | 705360    | WDR90     | rs3803697  | T | C | 0.402299  | 0.00570293 | 0.58616598 |
| chr19 | 55174498  | LILRB4    | rs28366008 | T | C | 0.206897  | 0.00571795 | 0.58616598 |
| chrX  | 151909156 | CSAG1     | rs2515848  | A | G | 0.517241  | 0.00580634 | 0.58616598 |
| chr3  | 170802910 | TNIK      | rs17857452 | C | T | 0.0747126 | 0.00593548 | 0.58616598 |
| chr5  | 140813    | PLEKHG4B  | rs73022563 | G | T | 0.0574713 | 0.00597586 | 0.58616598 |
| chr16 | 48258198  | ABCC11    | rs17822931 | C | T | 0.172414  | 0.00600186 | 0.58616598 |
| chr16 | 55897289  | CES5A     | rs11076126 | C | T | 0.0574713 | 0.00603215 | 0.58616598 |
| chr8  | 2005883   | MYOM2     | rs17064618 | C | T | 0.0517241 | 0.00604969 | 0.58616598 |
| chr7  | 107671407 | LAMB4     | rs2528693  | C | G | 0.0632184 | 0.00606606 | 0.58616598 |
| chr17 | 64023624  | CEP112    | rs17704679 | T | C | 0.528736  | 0.00609735 | 0.58616598 |
| chr12 | 49390677  | DDN       | rs10783299 | T | C | 0.367816  | 0.00610145 | 0.58616598 |
| chr11 | 70118489  | PPFIA1    | rs546502   | G | A | 0.235632  | 0.00611955 | 0.58616598 |
| chr21 | 47666744  | MCM3AP    | rs17183220 | G | T | 0.0747126 | 0.00612718 | 0.58616598 |
| chr6  | 28264692  | PGBD1     | rs3800325  | C | G | 0.114943  | 0.00618624 | 0.58616598 |

|       |           |          |             |            |      |           |            |            |
|-------|-----------|----------|-------------|------------|------|-----------|------------|------------|
| chr6  | 28270047  | PGBD1    | rs6456811   | C          | G    | 0.114943  | 0.00618624 | 0.58616598 |
| chr5  | 32087374  | PDZD2    | rs157496    | A          | G    | 0.195402  | 0.00619203 | 0.58616598 |
| chr17 | 1684605   | SMYD4    | rs58337165  | G          | T    | 0.0517241 | 0.00619561 | 0.58616598 |
| chrX  | 50350728  | SHROOM4  | rs143151534 | T          | TTCC | 0.224138  | 0.00623563 | 0.58672849 |
| chrX  | 50350728  | SHROOM4  | rs6614552   | T          | TTCC | 0.224138  | 0.00623563 | 0.58672849 |
| chr10 | 73501556  | CDH23    | rs1227051   | G          | A    | 0.781609  | 0.00636221 | 0.59474704 |
| chr7  | 140080087 | SLC37A3  | rs62490396  | C          | G    | 0.425287  | 0.00641238 | 0.59474704 |
| chr16 | 70896122  | HYDIN    | rs7192347   | A          | C    | 0.41954   | 0.00642447 | 0.59474704 |
| chr1  | 175129946 | KIAA0040 | rs386636937 | CTTCTTCTTG | T    | 0.275862  | 0.00658653 | 0.60648909 |
| chr1  | 175129946 | KIAA0040 | rs2072035   | CTTCTTCTTG | T    | 0.275862  | 0.00658653 | 0.60648909 |
| chr1  | 210577901 | HHAT     | rs34228541  | T          | C    | 0.178161  | 0.00693861 | 0.62280979 |
| chr7  | 42005678  | GLI3     | rs929387    | G          | A    | 0.327586  | 0.00716609 | 0.62280979 |
| chr16 | 58318604  | PRSS54   | rs3815803   | T          | C    | 0.482759  | 0.00722917 | 0.62280979 |
| chr19 | 53209553  | ZNF611   | rs4085566   | G          | A    | 0.436782  | 0.00724908 | 0.62280979 |
| chr19 | 53209554  | ZNF611   | rs4085565   | G          | T    | 0.436782  | 0.00724908 | 0.62280979 |
| chr1  | 93720070  | CCDC18   | rs12030843  | C          | G    | 0.252874  | 0.00728077 | 0.62280979 |
| chr10 | 74899134  | ECD      | rs3736518   | C          | G    | 0.0804598 | 0.0073035  | 0.62280979 |
| chr10 | 74923562  | ECD      | rs3812619   | C          | T    | 0.0804598 | 0.0073035  | 0.62280979 |
| chr10 | 75035257  | TTC18    | rs4294502   | T          | C    | 0.0804598 | 0.0073035  | 0.62280979 |
| chr5  | 140532    | PLEKHG4B | rs12516846  | T          | C    | 0.109195  | 0.00730611 | 0.62280979 |
| chr5  | 143197    | PLEKHG4B | rs11949577  | G          | A    | 0.109195  | 0.00730611 | 0.62280979 |
| chr5  | 143534    | PLEKHG4B | rs13436090  | G          | A    | 0.109195  | 0.00730611 | 0.62280979 |
| chr6  | 116600810 | TSPYL1   | rs3828743   | G          | A    | 0.252874  | 0.00735369 | 0.62280979 |
| chr3  | 184019681 | PSMD2    | rs11545172  | G          | A    | 0.0747126 | 0.00745066 | 0.62280979 |
| chr19 | 36017928  | SBSN     | rs10775583  | G          | C    | 0.385057  | 0.00746885 | 0.62280979 |
| chr17 | 5436263   | NLRP1    | rs2301582   | C          | T    | 0.373563  | 0.00750947 | 0.62280979 |
| chr16 | 88872229  | CDT1     | rs480727    | A          | G    | 0.431034  | 0.00753603 | 0.62280979 |
| chr12 | 6639981   | NCAPD2   | rs2240871   | C          | G    | 0.183908  | 0.00757414 | 0.62280979 |
| chr17 | 15510888  | CDRT1    | rs62070401  | G          | A    | 0.189655  | 0.00763184 | 0.62280979 |
| chr17 | 15510988  | CDRT1    | rs3826385   | T          | C    | 0.189655  | 0.00763184 | 0.62280979 |
| chr11 | 116691634 | APOA4    | rs5110      | C          | A    | 0.0689655 | 0.00776471 | 0.62280979 |

|       |           |           |             |      |      |           |            |            |
|-------|-----------|-----------|-------------|------|------|-----------|------------|------------|
| chr22 | 36122930  | APOL5     | rs2076671   | C    | T    | 0.333333  | 0.00777849 | 0.62280979 |
| chr22 | 36124860  | APOL5     | rs2076673   | C    | G    | 0.333333  | 0.00777849 | 0.62280979 |
| chr17 | 80895933  | TBCD      | rs3785522   | A    | G    | 0.775862  | 0.00778203 | 0.62280979 |
| chr19 | 58879660  | ZNF837    | rs61746138  | T    | C    | 0.0977011 | 0.00779123 | 0.62280979 |
| chr19 | 58880242  | ZNF837    | rs7256940   | T    | C    | 0.0977011 | 0.00779123 | 0.62280979 |
| chr4  | 3006043   | GRK4      | rs1024323   | C    | T    | 0.316092  | 0.00781259 | 0.62280979 |
| chr10 | 24873369  | ARHGAP21  | rs1127893   | C    | G    | 0.522989  | 0.00785273 | 0.62280979 |
| chr15 | 102264476 | TARSL2    | rs1143136   | C    | A    | 0.235632  | 0.00793349 | 0.62280979 |
| chr3  | 138191232 | ESYT3     | rs10935282  | G    | A    | 0.425287  | 0.0080507  | 0.62280979 |
| chr3  | 53857803  | CHDH      | rs12676     | A    | C    | 0.672414  | 0.00805816 | 0.62280979 |
| chr10 | 50122109  | LRRC18    | rs17772611  | C    | T    | 0.126437  | 0.00806064 | 0.62280979 |
| chr10 | 50109895  | WDFY4     | rs35423873  | A    | C    | 0.126437  | 0.00806064 | 0.62280979 |
| chr3  | 195510827 | MUC4      | rs413807    | C    | T    | 0.356322  | 0.00814807 | 0.62280979 |
| chr9  | 98691137  | C9orf102  | rs2274654   | T    | C    | 0.155172  | 0.00816217 | 0.62280979 |
| chr6  | 143823112 | FUCA2     | rs3762001   | G    | A    | 0.189655  | 0.00828559 | 0.62280979 |
| chr9  | 107299001 | OR13C3    | rs41304943  | C    | A    | 0.114943  | 0.00832326 | 0.62280979 |
| chr1  | 236175327 | NID1      | rs3738531   | C    | A    | 0.103448  | 0.00833834 | 0.62280979 |
| chr22 | 29837566  | RFPL1     | rs3842466   | TTCC | T    | 0.37931   | 0.00841572 | 0.62280979 |
| chr22 | 29837566  | RFPL1-AS1 | rs3842466   | TTCC | T    | 0.37931   | 0.00841572 | 0.62280979 |
| chr19 | 55895588  | LOC388564 | rs1870074   | G    | A    | 0.833333  | 0.00845074 | 0.62280979 |
| chr19 | 18255359  | MAST3     | rs8108738   | G    | A    | 0.517241  | 0.00851401 | 0.62280979 |
| chr5  | 179290845 | TBC1D9B   | rs30386     | T    | G    | 0.494253  | 0.00852599 | 0.62280979 |
| chr3  | 187088926 | RTP4      | rs1533594   | G    | A    | 0.821839  | 0.00854401 | 0.62280979 |
| chr1  | 210004199 | DIEXF     | rs585627    | C    | G    | 0.718391  | 0.00858829 | 0.62280979 |
| chr4  | 77818548  | ANKRD56   | rs2703129   | T    | C    | 0.373563  | 0.00859009 | 0.62280979 |
| chr17 | 15496730  | CDRT1     | rs8078150   | A    | G    | 0.258621  | 0.00861401 | 0.62280979 |
| chr9  | 115932012 | FKBP15    | rs57348436  | G    | T    | 0.0689655 | 0.00862249 | 0.62280979 |
| chr9  | 115932150 | FKBP15    | rs113480096 | T    | TTTC | 0.0689655 | 0.00862249 | 0.62280979 |
| chr9  | 115933980 | FKBP15    | rs1128116   | C    | A    | 0.0689655 | 0.00862249 | 0.62280979 |
| chr1  | 29542637  | MECR      | rs1128400   | A    | G    | 0.925287  | 0.00864461 | 0.62280979 |
| chr1  | 29475648  | SRSF4     | rs2230679   | T    | G    | 0.925287  | 0.00864461 | 0.62280979 |

|       |           |          |              |    |       |           |            |            |
|-------|-----------|----------|--------------|----|-------|-----------|------------|------------|
| chr15 | 72767214  | ARIH1    | rs1060499844 | T  | TGGC  | 0.0574713 | 0.008711   | 0.62308375 |
| chr21 | 34614250  | IFNAR2   | rs2229207    | T  | C     | 0.0862069 | 0.00874023 | 0.62308375 |
| chr2  | 120060082 | C2orf76  | rs1052500    | T  | C     | 0.655172  | 0.00875697 | 0.62308375 |
| chr19 | 11891003  | ZNF441   | rs799193     | G  | A     | 0.752874  | 0.00885677 | 0.62759145 |
| chr4  | 164048199 | NAF1     | rs4691895    | G  | C     | 0.775862  | 0.00897333 | 0.62967947 |
| chr4  | 164085425 | NAF1     | rs4691896    | T  | C     | 0.775862  | 0.00897333 | 0.62967947 |
| chr18 | 30846895  | C18orf34 | rs9965081    | A  | T     | 0.931034  | 0.00900296 | 0.62967947 |
| chr17 | 41223094  | BRCA1    | rs1799966    | T  | C     | 0.33908   | 0.00909226 | 0.62967947 |
| chr17 | 41244000  | BRCA1    | rs16942      | T  | C     | 0.33908   | 0.00909226 | 0.62967947 |
| chr17 | 41244435  | BRCA1    | rs16941      | T  | C     | 0.333333  | 0.00910565 | 0.62967947 |
| chr7  | 97488569  | ASNS     | rs1049674    | A  | T     | 0.695402  | 0.00914362 | 0.62977597 |
| chr16 | 31099011  | PRSS53   | rs11150606   | T  | C     | 0.0517241 | 0.00919685 | 0.63077675 |
| chr9  | 2191309   | SMARCA2  | rs2296212    | C  | G     | 0.143678  | 0.00929727 | 0.63077675 |
| chr9  | 18777196  | ADAMTSL1 | rs41268983   | A  | C     | 0.114943  | 0.00932881 | 0.63077675 |
| chr5  | 80409526  | RASGRF2  | rs34193571   | T  | C     | 0.0862069 | 0.00932948 | 0.63077675 |
| chr17 | 41244936  | BRCA1    | rs799917     | G  | A     | 0.350575  | 0.00950292 | 0.63077675 |
| chr18 | 54815025  | BOD1P    | rs11151997   | G  | T     | 0.574713  | 0.0095504  | 0.63077675 |
| chr18 | 44181227  | LOXHD1   | rs10163657   | C  | T     | 0.091954  | 0.0095818  | 0.63077675 |
| chr19 | 17451981  | GTPBP3   | rs3745193    | G  | A     | 0.0574713 | 0.00959429 | 0.63077675 |
| chr19 | 35422808  | ZNF30    | rs10422961   | C  | T     | 0.247126  | 0.00963903 | 0.63077675 |
| chr17 | 62020348  | SCN4A    | rs2058194    | T  | C     | 0.5       | 0.00969879 | 0.63077675 |
| chr1  | 248128929 | OR2AK2   | rs6664332    | G  | A     | 0.367816  | 0.00972643 | 0.63077675 |
| chr1  | 9324213   | H6PD     | rs17368528   | C  | T     | 0.103448  | 0.00981585 | 0.63077675 |
| chr1  | 151735576 | MRPL9    | rs7007       | T  | C     | 0.137931  | 0.00984056 | 0.63077675 |
| chr1  | 151735576 | OAZ3     | rs7007       | T  | C     | 0.137931  | 0.00984056 | 0.63077675 |
| chr2  | 133174764 | GPR39    | rs2241764    | C  | T     | 0.367816  | 0.00989613 | 0.63077675 |
| chr5  | 149546828 | CDX1     | rs2302275    | C  | G     | 0.471264  | 0.00995655 | 0.63077675 |
| chr16 | 89291210  | ZNF778   | rs10625512   | G  | GGTGA | 0.885057  | 0.00996191 | 0.63077675 |
| chr11 | 6541225   | DNHD1    | rs11603869   | C  | G     | 0.235632  | 0.0099647  | 0.63077675 |
| chr3  | 58625875  | FAM3D    | rs33966924   | C  | A     | 0.149425  | 0.0099893  | 0.63077675 |
| chr4  | 101108875 | DDIT4L   | rs58706659   | GT | G     | 0.114943  | 0.00999469 | 0.63077675 |

|       |           |           |             |      |   |           |            |            |
|-------|-----------|-----------|-------------|------|---|-----------|------------|------------|
| chr4  | 101108877 | DDIT4L    | rs201713115 | T    | C | 0.114943  | 0.00999469 | 0.63077675 |
| chr6  | 2685775   | HCG27     | rs34953021  | G    | A | 0.091954  | 0.0100007  | 0.63077675 |
| chr6  | 2685775   | MYLK4     | rs34953021  | G    | A | 0.091954  | 0.0100007  | 0.63077675 |
| chr15 | 85188839  | WDR73     | rs11073619  | C    | T | 0.103448  | 0.0100862  | 0.63203122 |
| chr17 | 17896205  | LRRRC48   | rs4584886   | C    | T | 0.293103  | 0.010094   | 0.63203122 |
| chr11 | 8132301   | RIC3      | rs11826236  | C    | T | 0.0804598 | 0.0102241  | 0.63347405 |
| chr11 | 8159857   | RIC3      | rs55990541  | C    | T | 0.0804598 | 0.0102241  | 0.63347405 |
| chr12 | 106641489 | CKAP4     | rs368519473 | GGGC | G | 0.614943  | 0.0102352  | 0.63347405 |
| chr11 | 117267884 | CEP164    | rs573455    | A    | G | 0.511494  | 0.0102642  | 0.63347405 |
| chr11 | 102477377 | MMP20     | rs1784424   | G    | T | 0.511494  | 0.0104716  | 0.64167431 |
| chr11 | 102477395 | MMP20     | rs1784423   | A    | G | 0.511494  | 0.0104716  | 0.64167431 |
| chr19 | 51485622  | KLK7      | rs2659067   | A    | G | 0.862069  | 0.0105438  | 0.64183062 |
| chr1  | 203186093 | CHIT1     | rs1065761   | G    | C | 0.12069   | 0.0105487  | 0.64183062 |
| chr4  | 36310065  | DTHD1     | rs61739432  | G    | A | 0.0574713 | 0.0106311  | 0.64456659 |
| chr2  | 148730367 | ORC4      | rs2307397   | G    | C | 0.0574713 | 0.0109095  | 0.64661247 |
| chr19 | 35435006  | ZNF30     | rs1345658   | G    | A | 0.436782  | 0.0110277  | 0.64661247 |
| chr19 | 35450229  | ZNF792    | rs2651079   | C    | T | 0.436782  | 0.0110277  | 0.64661247 |
| chr16 | 48250026  | ABCC11    | rs11863236  | G    | T | 0.0574713 | 0.0110745  | 0.64661247 |
| chr16 | 48265777  | ABCC11    | rs16945988  | C    | T | 0.0574713 | 0.0110745  | 0.64661247 |
| chr19 | 35434238  | ZNF30     | rs1811      | A    | G | 0.431034  | 0.0110947  | 0.64661247 |
| chr20 | 37396120  | ACTR5     | rs2245231   | A    | G | 0.413793  | 0.0111281  | 0.64661247 |
| chr22 | 29837537  | RFPL1     | rs3804076   | T    | C | 0.367816  | 0.0112667  | 0.64661247 |
| chr22 | 29837537  | RFPL1-AS1 | rs3804076   | T    | C | 0.367816  | 0.0112667  | 0.64661247 |
| chr7  | 6194274   | USP42     | rs6463529   | T    | C | 0.126437  | 0.0114191  | 0.64661247 |
| chr2  | 29274730  | FAM179A   | rs7577483   | G    | T | 0.091954  | 0.0114219  | 0.64661247 |
| chr8  | 72936145  | TRPA1     | rs959976    | T    | C | 0.183908  | 0.0115374  | 0.64661247 |
| chr19 | 51843808  | VSIG10L   | rs7259266   | C    | T | 0.614943  | 0.0116371  | 0.64661247 |
| chr19 | 51845371  | VSIG10L   | rs10414211  | T    | G | 0.614943  | 0.0116371  | 0.64661247 |
| chr7  | 2649777   | IQCE      | rs1061566   | C    | T | 0.137931  | 0.0117305  | 0.64661247 |
| chr6  | 29796376  | HLA-G     | rs12722477  | C    | A | 0.0977011 | 0.0117582  | 0.64661247 |
| chr6  | 44115169  | TMEM63B   | rs4714759   | G    | A | 0.0977011 | 0.0118422  | 0.64661247 |

|       |           |          |             |   |      |           |           |            |
|-------|-----------|----------|-------------|---|------|-----------|-----------|------------|
| chr4  | 15709192  | BST1     | rs2302465   | G | A    | 0.149425  | 0.0119245 | 0.64661247 |
| chr4  | 15688604  | FAM200B  | rs2302469   | G | C    | 0.149425  | 0.0119245 | 0.64661247 |
| chr19 | 49376584  | PPP1R15A | rs3786734   | G | A    | 0.0747126 | 0.0119568 | 0.64661247 |
| chr16 | 722331    | RHOT2    | rs3177338   | C | T    | 0.408046  | 0.0119643 | 0.64661247 |
| chr16 | 715990    | WDR90    | rs7190775   | G | A    | 0.396552  | 0.0120736 | 0.64661247 |
| chr5  | 139931628 | SRA1     | .           | A | AGTC | 0.448276  | 0.0120779 | 0.64661247 |
| chr5  | 139931629 | SRA1     | rs202193903 | C | G    | 0.448276  | 0.0120779 | 0.64661247 |
| chr6  | 29408313  | OR10C1   | rs2074466   | C | A    | 0.178161  | 0.0120799 | 0.64661247 |
| chr6  | 29394926  | OR11A1   | rs9257857   | C | T    | 0.178161  | 0.0120799 | 0.64661247 |
| chr8  | 20038466  | SLC18A1  | rs2270641   | T | G    | 0.413793  | 0.0120917 | 0.64661247 |
| chr11 | 4967532   | OR51A4   | rs2595988   | G | C    | 0.16092   | 0.0120941 | 0.64661247 |
| chr3  | 130947435 | NEK11    | rs3738000   | A | T    | 0.718391  | 0.0121129 | 0.64661247 |
| chr1  | 152128212 | RPTN     | rs143744326 | C | G    | 0.0574713 | 0.0121152 | 0.64661247 |
| chr1  | 29475341  | SRSF4    | rs2230678   | C | T    | 0.833333  | 0.0121369 | 0.64661247 |
| chr1  | 29475394  | SRSF4    | rs2230677   | C | G    | 0.833333  | 0.0121369 | 0.64661247 |
| chr1  | 43201614  | CLDN19   | rs9660973   | C | T    | 0.0517241 | 0.012144  | 0.64661247 |
| chr1  | 43212926  | LEPRE1   | rs67014447  | G | A    | 0.0517241 | 0.012144  | 0.64661247 |
| chr1  | 43223489  | LEPRE1   | rs6700677   | C | T    | 0.0517241 | 0.012144  | 0.64661247 |
| chr1  | 43232504  | LEPRE1   | rs55716016  | C | A    | 0.0517241 | 0.012144  | 0.64661247 |
| chr17 | 10541515  | MYH3     | rs2285477   | C | T    | 0.810345  | 0.0121512 | 0.64661247 |
| chr11 | 26586801  | MUC15    | rs15783     | G | A    | 0.655172  | 0.0122031 | 0.64661247 |
| chr19 | 54745907  | LILRA6   | rs62133127  | A | G    | 0.189655  | 0.0122369 | 0.64661247 |
| chr2  | 29256374  | FAM179A  | rs60403047  | C | T    | 0.091954  | 0.0122507 | 0.64661247 |
| chr6  | 157100396 | ARID1B   | rs572236007 | G | GCGC | 0.091954  | 0.0122815 | 0.64661247 |
| chr5  | 174106    | PLEKHG4B | rs4956987   | G | A    | 0.574713  | 0.0123224 | 0.64661247 |
| chr1  | 55247097  | TTC22    | rs2286203   | G | A    | 0.172414  | 0.0123643 | 0.64661247 |
| chr11 | 5718517   | TRIM22   | rs7935564   | G | A    | 0.609195  | 0.0123777 | 0.64661247 |
| chr21 | 35239562  | ITSN1    | rs56279221  | A | G    | 0.103448  | 0.012421  | 0.64661247 |
| chr15 | 45554267  | SLC28A2  | rs1060896   | C | A    | 0.637931  | 0.0124235 | 0.64661247 |
| chr14 | 105416220 | AHNAK2   | rs2819435   | T | A    | 0.764368  | 0.0124298 | 0.64661247 |
| chr4  | 169928842 | CBR4     | rs2877380   | G | T    | 0.729885  | 0.0125286 | 0.64978905 |

|       |           |                  |            |   |   |           |           |            |
|-------|-----------|------------------|------------|---|---|-----------|-----------|------------|
| chr2  | 174128513 | ZAK              | rs3769148  | C | T | 0.488506  | 0.0127651 | 0.65957534 |
| chr17 | 46939658  | CALCOCO2         | rs10278    | C | G | 0.316092  | 0.0127939 | 0.65957534 |
| chr6  | 34831856  | UHRF1BP1         | rs13205210 | T | C | 0.0862069 | 0.0128635 | 0.6611839  |
| chr19 | 9024871   | MUC16            | rs62118272 | C | T | 0.0862069 | 0.0129539 | 0.66301836 |
| chr7  | 107677984 | LAMB4            | rs1627354  | G | A | 0.0632184 | 0.0129762 | 0.66301836 |
| chr17 | 78091405  | GAA              | rs1126690  | G | A | 0.758621  | 0.0130254 | 0.6635632  |
| chr6  | 133045812 | VNN3             | rs2294758  | G | A | 0.316092  | 0.0130901 | 0.66489213 |
| chr11 | 62434173  | METTL12          | rs11231181 | G | A | 0.275862  | 0.0131538 | 0.66616259 |
| chr1  | 197070521 | ASPM             | rs12138336 | C | G | 0.0574713 | 0.0131956 | 0.66631975 |
| chr6  | 130374102 | L3MBTL3          | rs9388768  | C | A | 0.678161  | 0.0132944 | 0.66934583 |
| chr8  | 2021421   | MYOM2            | rs2272720  | G | T | 0.431034  | 0.0133468 | 0.66978907 |
| chr2  | 113498566 | CKAP2L           | rs3811040  | A | G | 0.545977  | 0.013381  | 0.66978907 |
| chr15 | 59981590  | BNIP2            | rs754641   | G | A | 0.45977   | 0.0134852 | 0.67113906 |
| chr20 | 44005936  | TP53TG5          | rs2231616  | C | T | 0.132184  | 0.0135224 | 0.67113906 |
| chr2  | 84848596  | DNAH6            | rs61733547 | G | A | 0.0804598 | 0.0135249 | 0.67113906 |
| chr19 | 12186732  | ZNF844           | rs76842919 | A | G | 0.0747126 | 0.0135886 | 0.67236237 |
| chr1  | 64095111  | PGM1             | rs855314   | A | G | 0.137931  | 0.0136444 | 0.67318889 |
| chr19 | 9868278   | ZNF846           | rs10420364 | T | C | 0.206897  | 0.0137312 | 0.6736112  |
| chr19 | 9868404   | ZNF846           | rs10414485 | C | T | 0.206897  | 0.0137312 | 0.6736112  |
| chr16 | 2260612   | C16orf79         | rs26856    | T | C | 0.689655  | 0.0140514 | 0.67921001 |
| chr20 | 18794754  | C20orf79         | rs1053839  | C | T | 0.16092   | 0.0140638 | 0.67921001 |
| chr6  | 30313340  | RPP21            | rs6986     | G | C | 0.258621  | 0.0141323 | 0.67921001 |
| chr6  | 30313340  | TRIM39-<br>RPP21 | rs6986     | G | C | 0.258621  | 0.0141323 | 0.67921001 |
| chr11 | 62439569  | C11orf83         | rs13941    | G | A | 0.695402  | 0.0141434 | 0.67921001 |
| chr10 | 101147692 | CNNM1            | rs2298316  | G | A | 0.091954  | 0.0141744 | 0.67921001 |
| chr2  | 120078778 | C2orf76          | rs1132267  | T | C | 0.666667  | 0.0142211 | 0.67921001 |
| chr19 | 9028373   | MUC16            | rs56396897 | G | A | 0.281609  | 0.0142923 | 0.67921001 |
| chr7  | 99457605  | CYP3A43          | rs680055   | C | G | 0.091954  | 0.0143338 | 0.67921001 |
| chr7  | 99473858  | OR2AE1           | rs17161997 | G | C | 0.091954  | 0.0143338 | 0.67921001 |
| chr10 | 70856852  | SRGN             | rs2229498  | G | A | 0.804598  | 0.0144273 | 0.67921001 |

|       |           |          |             |   |   |           |           |            |
|-------|-----------|----------|-------------|---|---|-----------|-----------|------------|
| chr8  | 92136728  | LRRRC69  | rs11785003  | C | T | 0.563218  | 0.0144284 | 0.67921001 |
| chr8  | 72977703  | TRPA1    | rs920829    | C | T | 0.126437  | 0.0144383 | 0.67921001 |
| chr2  | 74007136  | DUSP11   | rs2272051   | T | C | 0.649425  | 0.0144799 | 0.67921001 |
| chr1  | 20246876  | PLA2G2E  | rs61729970  | C | T | 0.109195  | 0.0144838 | 0.67921001 |
| chr19 | 56953963  | ZNF667   | rs35914474  | G | A | 0.494253  | 0.0144923 | 0.67921001 |
| chr6  | 143823157 | FUCA2    | rs3762002   | T | C | 0.195402  | 0.0145159 | 0.67921001 |
| chr6  | 31379931  | MICA     | rs1063635   | G | A | 0.5       | 0.0146552 | 0.68339063 |
| chr16 | 3165425   | MGC3771  | rs909410    | A | G | 0.413793  | 0.0147439 | 0.68339063 |
| chr16 | 3165425   | ZNF205   | rs909410    | A | G | 0.413793  | 0.0147439 | 0.68339063 |
| chr19 | 3821408   | ZFR2     | rs61742027  | G | A | 0.0517241 | 0.014764  | 0.68339063 |
| chr2  | 71160222  | VAX2     | rs2234500   | C | G | 0.091954  | 0.0150018 | 0.69097913 |
| chr15 | 90335788  | ANPEP    | rs25651     | C | T | 0.333333  | 0.0150082 | 0.69097913 |
| chr10 | 26434455  | MYO3A    | rs33947968  | G | T | 0.12069   | 0.0150857 | 0.69269512 |
| chr19 | 44352665  | ZNF283   | rs2356437   | T | C | 0.735632  | 0.0152004 | 0.69498064 |
| chr12 | 48151822  | RAPGEF3  | rs11168230  | C | G | 0.321839  | 0.0152162 | 0.69498064 |
| chr9  | 100388119 | TSTD2    | rs10817858  | G | T | 0.218391  | 0.0153323 | 0.69498064 |
| chr14 | 105411700 | AHNAK2   | rs4264326   | A | G | 0.494253  | 0.0153493 | 0.69498064 |
| chr12 | 12483764  | MANSC1   | rs17375215  | C | T | 0.0574713 | 0.0153539 | 0.69498064 |
| chr19 | 56953585  | ZNF667   | rs3760849   | T | C | 0.494253  | 0.0153852 | 0.69498064 |
| chr21 | 45811343  | TRPM2    | rs1556314   | T | G | 0.206897  | 0.0154784 | 0.69498064 |
| chr1  | 144879339 | PDE4DIP  | rs145959230 | C | T | 0.0804598 | 0.015498  | 0.69498064 |
| chr17 | 3627473   | GSG2     | rs9907144   | C | T | 0.477011  | 0.0155621 | 0.69498064 |
| chr17 | 3628362   | GSG2     | rs3809806   | T | C | 0.477011  | 0.0155621 | 0.69498064 |
| chr18 | 11689699  | GNAL     | rs7236433   | G | A | 0.172414  | 0.0155929 | 0.69498064 |
| chr1  | 62673225  | L1TD1    | rs7533274   | G | A | 0.649425  | 0.0156402 | 0.69498064 |
| chr2  | 75923413  | C2orf3   | rs7560262   | T | C | 0.45977   | 0.0156796 | 0.69498064 |
| chr17 | 2600186   | KIAA0664 | rs11078312  | G | A | 0.137931  | 0.0157863 | 0.69498064 |
| chr6  | 116575116 | TSPYL4   | rs17524614  | G | T | 0.137931  | 0.0157974 | 0.69498064 |
| chr1  | 179852074 | TOR1AIP1 | rs1281378   | T | C | 0.609195  | 0.0158205 | 0.69498064 |
| chr1  | 179876988 | TOR1AIP1 | rs609521    | C | G | 0.603448  | 0.0158885 | 0.69498064 |
| chr8  | 63951312  | GGH      | rs1800909   | A | G | 0.275862  | 0.015906  | 0.69498064 |

|       |           |          |             |   |    |           |           |            |
|-------|-----------|----------|-------------|---|----|-----------|-----------|------------|
| chr16 | 71660404  | MARVELD3 | rs61753635  | G | A  | 0.298851  | 0.0159221 | 0.69498064 |
| chr19 | 17392630  | ANKLE1   | rs139615873 | G | GC | 0.0689655 | 0.0159427 | 0.69498064 |
| chr19 | 45867259  | ERCC2    | rs1799793   | C | T  | 0.321839  | 0.0160467 | 0.6977478  |
| chr14 | 105411781 | AHNAK2   | rs10438247  | G | A  | 0.494253  | 0.0161895 | 0.69823686 |
| chr19 | 8486884   | MARCH2   | rs1133893   | G | A  | 0.275862  | 0.0162561 | 0.69823686 |
| chr17 | 67210992  | ABCA10   | rs11657804  | T | C  | 0.402299  | 0.0162823 | 0.69823686 |
| chr19 | 464310    | ODF3L2   | rs34551779  | A | G  | 0.482759  | 0.0162912 | 0.69823686 |
| chr6  | 31378358  | MICA     | rs1063630   | T | G  | 0.189655  | 0.0163048 | 0.69823686 |
| chr6  | 31380198  | MICA     | rs61738275  | C | T  | 0.189655  | 0.0163048 | 0.69823686 |
| chr16 | 58743454  | GOT2     | rs30842     | A | C  | 0.66092   | 0.0163418 | 0.69823686 |
| chr19 | 22156943  | ZNF208   | rs12462668  | G | A  | 0.126437  | 0.0164305 | 0.69829798 |
| chr1  | 202129826 | PTPN7    | rs4309039   | T | C  | 0.431034  | 0.0164859 | 0.69829798 |
| chr22 | 18923713  | PRODH    | rs3815655   | G | A  | 0.0747126 | 0.0165272 | 0.69829798 |
| chr1  | 215914826 | USH2A    | rs35309576  | T | C  | 0.264368  | 0.016546  | 0.69829798 |
| chr1  | 215916563 | USH2A    | rs11120616  | G | A  | 0.264368  | 0.016546  | 0.69829798 |
| chr15 | 43571463  | TGM7     | rs148818002 | G | A  | 0.0574713 | 0.0166278 | 0.69878482 |
| chr8  | 63951237  | GGH      | rs11545077  | C | T  | 0.241379  | 0.0166387 | 0.69878482 |
| chr14 | 105408811 | AHNAK2   | rs2819421   | A | G  | 0.494253  | 0.0167011 | 0.69969888 |
| chr12 | 1910786   | CACNA2D4 | rs62621429  | C | T  | 0.0632184 | 0.0168126 | 0.70123136 |
| chr19 | 33647379  | WDR88    | rs11881580  | T | C  | 0.12069   | 0.0168437 | 0.70123136 |
| chr6  | 31380194  | MICA     | rs41554412  | T | C  | 0.16092   | 0.0168905 | 0.70123136 |
| chr4  | 84383810  | FAM175A  | rs12642536  | C | T  | 0.408046  | 0.0169305 | 0.70123136 |
| chr16 | 708275    | WDR90    | rs45613635  | C | A  | 0.224138  | 0.0169413 | 0.70123136 |
| chr14 | 105418391 | AHNAK2   | rs11625007  | C | T  | 0.488506  | 0.0170417 | 0.70299648 |
| chr19 | 7763248   | FCER2    | rs2228137   | G | A  | 0.143678  | 0.0171074 | 0.70299648 |
| chr5  | 127609633 | FBN2     | rs2291628   | G | A  | 0.0747126 | 0.0171948 | 0.70299648 |
| chr17 | 16664991  | CCDC144A | rs3869489   | G | A  | 0.0747126 | 0.0173281 | 0.70299648 |
| chr16 | 88808743  | FAM38A   | rs6500495   | A | G  | 0.925287  | 0.0173345 | 0.70299648 |
| chr5  | 179264731 | C5orf45  | rs10277     | T | C  | 0.563218  | 0.0174135 | 0.70299648 |
| chr5  | 179264731 | SQSTM1   | rs10277     | T | C  | 0.563218  | 0.0174135 | 0.70299648 |
| chr5  | 179280379 | C5orf45  | rs1650893   | T | C  | 0.563218  | 0.0174135 | 0.70299648 |

|       |           |          |             |                        |   |           |           |            |
|-------|-----------|----------|-------------|------------------------|---|-----------|-----------|------------|
| chr11 | 60070176  | MS4A4A   | rs6591561   | A                      | G | 0.310345  | 0.0175306 | 0.70299648 |
| chr4  | 967191    | DGKQ     | rs17855876  | G                      | A | 0.091954  | 0.0176471 | 0.70299648 |
| chr1  | 34038214  | CSMD2    | rs2641962   | T                      | C | 0.436782  | 0.0178639 | 0.70299648 |
| chr7  | 140244560 | DENND2A  | rs2293177   | C                      | T | 0.333333  | 0.0179341 | 0.70299648 |
| chr20 | 62193445  | PRIC285  | rs3810481   | G                      | A | 0.172414  | 0.0180148 | 0.70299648 |
| chr3  | 121415610 | GOLGB1   | rs33988592  | G                      | A | 0.287356  | 0.0180304 | 0.70299648 |
| chr3  | 121351338 | HCLS1    | rs2070180   | C                      | T | 0.287356  | 0.0180304 | 0.70299648 |
| chr10 | 115409840 | NRAP     | rs2275799   | C                      | T | 0.298851  | 0.018043  | 0.70299648 |
| chr9  | 117808785 | TNC      | rs2104772   | T                      | A | 0.471264  | 0.0182558 | 0.70299648 |
| chr7  | 73097720  | DNAJC30  | rs28494095  | G                      | C | 0.126437  | 0.0183843 | 0.70299648 |
| chr1  | 153748161 | SLC27A3  | rs34527123  | G                      | C | 0.0747126 | 0.0185107 | 0.70299648 |
| chr7  | 92760738  | SAMD9L   | rs10282508  | T                      | G | 0.0574713 | 0.0185247 | 0.70299648 |
| chr1  | 158725080 | OR6K6    | rs16841001  | C                      | T | 0.12069   | 0.0185842 | 0.70299648 |
| chr3  | 40503506  | RPL14    | rs148931839 | C                      | T | 0.0632184 | 0.0186022 | 0.70299648 |
| chr11 | 64981587  | SLC22A20 | rs11605632  | G                      | A | 0.408046  | 0.018664  | 0.70299648 |
| chr20 | 23860178  | CST5     | rs1799841   | A                      | G | 0.390805  | 0.0186865 | 0.70299648 |
| chr1  | 111857208 | CHIA     | rs3818822   | G                      | A | 0.103448  | 0.0186935 | 0.70299648 |
| chr17 | 10346781  | MYH4     | rs3744554   | T                      | C | 0.396552  | 0.0187121 | 0.70299648 |
| chr17 | 10355763  | MYH4     | rs917361    | T                      | C | 0.396552  | 0.0187121 | 0.70299648 |
| chr17 | 10297658  | MYH8     | rs8069834   | A                      | G | 0.603448  | 0.0187161 | 0.70299648 |
| chr6  | 34214322  | C6orf1   | rs1150781   | C                      | G | 0.87931   | 0.0187236 | 0.70299648 |
| chr17 | 46607958  | HOXB1    | rs12939811  | T                      | A | 0.149425  | 0.0187718 | 0.70299648 |
| chr4  | 73414286  | ADAMTS3  | rs788908    | C                      | T | 0.649425  | 0.0189156 | 0.70299648 |
| chr17 | 78079597  | GAA      | rs1042393   | A                      | G | 0.752874  | 0.0189339 | 0.70299648 |
| chr17 | 78079669  | GAA      | rs1042395   | G                      | A | 0.752874  | 0.0189339 | 0.70299648 |
| chr10 | 46965018  | SYT15    | rs3127785   | C                      | G | 0.454023  | 0.0190104 | 0.70299648 |
| chr16 | 863355    | PRR25    | rs138733834 | AGGACGCCGG<br>ACCGACAC | A | 0.0804598 | 0.0190959 | 0.70299648 |
| chr8  | 27925204  | C8orf80  | rs4732620   | T                      | C | 0.568966  | 0.0191167 | 0.70299648 |
| chr20 | 139456    | DEFB127  | rs12624954  | G                      | A | 0.385057  | 0.0191313 | 0.70299648 |
| chr20 | 139576    | DEFB127  | rs16995685  | C                      | A | 0.385057  | 0.0191313 | 0.70299648 |

|       |           |               |             |         |   |           |           |            |
|-------|-----------|---------------|-------------|---------|---|-----------|-----------|------------|
| chr1  | 115231254 | AMPD1         | rs61752479  | G       | A | 0.0977011 | 0.0191471 | 0.70299648 |
| chr21 | 47766113  | PCNT          | rs34500739  | T       | G | 0.0689655 | 0.0191904 | 0.70299648 |
| chr21 | 47831845  | PCNT          | rs34268261  | G       | A | 0.0689655 | 0.0191904 | 0.70299648 |
| chr21 | 47841989  | PCNT          | rs61735814  | C       | T | 0.0689655 | 0.0191904 | 0.70299648 |
| chr21 | 47851636  | PCNT          | rs743346    | G       | A | 0.0689655 | 0.0191904 | 0.70299648 |
| chr21 | 47717493  | YBEY          | rs61736728  | G       | T | 0.0689655 | 0.0191904 | 0.70299648 |
| chr20 | 31627291  | BPIL3         | rs4911287   | A       | G | 0.442529  | 0.019219  | 0.70299648 |
| chr21 | 40720494  | HMG1          | rs34613278  | C       | T | 0.0632184 | 0.0192225 | 0.70299648 |
| chr11 | 47788663  | FNBP4         | rs397711020 | CGGTGGT | C | 0.45977   | 0.0193119 | 0.70299648 |
| chr7  | 149499284 | SSPO          | rs56163742  | C       | T | 0.126437  | 0.0193288 | 0.70299648 |
| chr5  | 33998768  | C1QTNF3-AMACR | rs34677     | C       | A | 0.143678  | 0.0193997 | 0.70299648 |
| chr5  | 33998768  | AMACR         | rs34677     | C       | A | 0.143678  | 0.0193997 | 0.70299648 |
| chr9  | 15188106  | TTC39B        | rs1407977   | T       | C | 0.649425  | 0.019429  | 0.70299648 |
| chr11 | 47701528  | AGBL2         | rs12286721  | C       | A | 0.517241  | 0.019452  | 0.70299648 |
| chr10 | 100017453 | LOXL4         | rs1983864   | T       | G | 0.321839  | 0.0195089 | 0.70299648 |
| chr6  | 26505362  | BTN1A1        | rs3736781   | G       | A | 0.528736  | 0.0195136 | 0.70299648 |
| chr6  | 26509330  | BTN1A1        | rs9393728   | C       | G | 0.528736  | 0.0195136 | 0.70299648 |
| chr14 | 105416959 | AHNAK2        | rs2013462   | A       | G | 0.534483  | 0.019627  | 0.70299648 |
| chr19 | 18273047  | PIK3R2        | rs1011320   | T       | C | 0.925287  | 0.0197351 | 0.70299648 |
| chr3  | 123665902 | CCDC14        | rs17310144  | T       | G | 0.597701  | 0.0197368 | 0.70299648 |
| chr10 | 115348046 | HABP2         | rs7080536   | G       | A | 0.0632184 | 0.0197806 | 0.70299648 |
| chr18 | 43246156  | SLC14A2       | rs9960464   | G       | A | 0.448276  | 0.0197938 | 0.70299648 |
| chr14 | 23830042  | EFS           | rs2231798   | T       | C | 0.281609  | 0.0197947 | 0.70299648 |
| chr1  | 17708528  | PADI6         | rs61766772  | G       | A | 0.0747126 | 0.0198006 | 0.70299648 |
| chr2  | 29225504  | FAM179A       | rs72786179  | T       | C | 0.0632184 | 0.0198129 | 0.70299648 |
| chr1  | 231408091 | GNPAT         | rs11558492  | A       | G | 0.172414  | 0.0198659 | 0.70299648 |
| chr14 | 105418344 | AHNAK2        | rs55791176  | T       | G | 0.477011  | 0.0198668 | 0.70299648 |
| chr9  | 97055310  | ZNF169        | rs1536690   | C       | T | 0.183908  | 0.0199175 | 0.70299648 |
| chr6  | 28269663  | PGBD1         | rs1997660   | A       | G | 0.316092  | 0.0199812 | 0.70299648 |
| chr15 | 59981515  | BNIP2         | rs3087328   | A       | G | 0.465517  | 0.0199894 | 0.70299648 |

|       |           |          |            |   |   |           |           |            |
|-------|-----------|----------|------------|---|---|-----------|-----------|------------|
| chr19 | 17000632  | F2RL3    | rs773902   | G | A | 0.224138  | 0.020015  | 0.70299648 |
| chr22 | 38477275  | SLC16A8  | rs75640043 | G | A | 0.0689655 | 0.0200365 | 0.70299648 |
| chr2  | 174131392 | ZAK      | rs35608243 | T | C | 0.091954  | 0.0200567 | 0.70299648 |
| chr2  | 88472791  | THNSL2   | rs4129190  | G | A | 0.827586  | 0.0200629 | 0.70299648 |
| chr7  | 1028448   | CYP2W1   | rs3808348  | C | T | 0.178161  | 0.0202043 | 0.70299648 |
| chr12 | 9317784   | PZP      | rs2277413  | A | G | 0.229885  | 0.0202629 | 0.70299648 |
| chr11 | 299411    | IFITM5   | rs57285449 | C | G | 0.413793  | 0.0203131 | 0.70299648 |
| chr16 | 88807896  | FAM38A   | rs7404939  | G | A | 0.0574713 | 0.020413  | 0.70299648 |
| chr1  | 20490518  | PLA2G2C  | rs6426616  | T | C | 0.574713  | 0.0204456 | 0.70299648 |
| chr1  | 2441358   | PANK4    | rs2494620  | T | C | 0.316092  | 0.0204583 | 0.70299648 |
| chr19 | 41497274  | CYP2B6   | rs8192709  | C | T | 0.0574713 | 0.0205385 | 0.70299648 |
| chr14 | 65253232  | SPTB     | rs77806    | T | C | 0.270115  | 0.0206414 | 0.70299648 |
| chr10 | 105177645 | PDCD11   | rs11598673 | G | T | 0.0574713 | 0.0207201 | 0.70299648 |
| chr18 | 44561100  | TCEB3B   | rs2571028  | C | G | 0.557471  | 0.0207833 | 0.70299648 |
| chr14 | 94936110  | SERPINA9 | rs45438398 | G | A | 0.12069   | 0.0208754 | 0.70299648 |
| chr19 | 9225685   | OR7G1    | rs2195951  | T | C | 0.183908  | 0.0209601 | 0.70299648 |
| chr19 | 9226192   | OR7G1    | rs6511874  | A | G | 0.183908  | 0.0209601 | 0.70299648 |
| chr22 | 42336172  | CENPM    | rs5758511  | G | A | 0.270115  | 0.0209813 | 0.70299648 |
| chr14 | 105414790 | AHNAK2   | rs2582513  | A | G | 0.505747  | 0.0210001 | 0.70299648 |
| chr3  | 124728626 | HEG1     | rs6438869  | A | G | 0.655172  | 0.021001  | 0.70299648 |
| chr16 | 68719113  | CDH3     | rs34494880 | G | A | 0.0689655 | 0.0210058 | 0.70299648 |
| chr5  | 5146335   | ADAMTS16 | rs2086310  | C | G | 0.83908   | 0.0211061 | 0.70299648 |
| chr14 | 105405599 | AHNAK2   | rs3742935  | G | C | 0.5       | 0.0211156 | 0.70299648 |
| chr14 | 105406238 | AHNAK2   | rs2819419  | A | C | 0.5       | 0.0211156 | 0.70299648 |
| chr14 | 105407798 | AHNAK2   | rs4465542  | T | C | 0.5       | 0.0211156 | 0.70299648 |
| chr14 | 105408955 | AHNAK2   | rs2819422  | A | G | 0.5       | 0.0211156 | 0.70299648 |
| chr14 | 105410183 | AHNAK2   | rs10438246 | T | C | 0.5       | 0.0211156 | 0.70299648 |
| chr14 | 105410827 | AHNAK2   | rs28380382 | C | T | 0.5       | 0.0211156 | 0.70299648 |
| chr14 | 105414629 | AHNAK2   | rs72702027 | G | A | 0.5       | 0.0211156 | 0.70299648 |
| chr14 | 105393556 | PLD4     | rs2841280  | G | C | 0.5       | 0.02112   | 0.70299648 |
| chr17 | 18024266  | MYO15A   | rs2955367  | T | G | 0.275862  | 0.0211649 | 0.70299648 |

|       |           |                  |             |   |   |           |           |            |
|-------|-----------|------------------|-------------|---|---|-----------|-----------|------------|
| chr10 | 12143105  | DHTKD1           | rs2062988   | C | G | 0.810345  | 0.0212307 | 0.70299648 |
| chr1  | 117122288 | IGSF3            | rs647711    | G | C | 0.442529  | 0.0213975 | 0.70299648 |
| chr1  | 117122288 | IGSF3            | rs781349066 | G | C | 0.442529  | 0.0213975 | 0.70299648 |
| chr1  | 156264648 | C1orf85          | rs1570805   | C | T | 0.091954  | 0.0214234 | 0.70299648 |
| chr2  | 241451351 | ANKMY1           | rs35044862  | G | A | 0.12069   | 0.0214537 | 0.70299648 |
| chr13 | 39343822  | FREM2            | rs9603422   | C | T | 0.103448  | 0.0215874 | 0.70299648 |
| chr3  | 98002587  | OR5H2            | rs16839611  | A | G | 0.247126  | 0.0215891 | 0.70299648 |
| chr16 | 31374535  | ITGAX            | rs2230429   | C | G | 0.321839  | 0.0216833 | 0.70299648 |
| chr17 | 79089590  | BAIAP2           | rs4969391   | A | G | 0.201149  | 0.0217062 | 0.70299648 |
| chr3  | 111887792 | SLC9A10          | rs76007436  | C | A | 0.0977011 | 0.0217063 | 0.70299648 |
| chr6  | 2955802   | SERPINB6         | rs2295769   | T | C | 0.310345  | 0.0217462 | 0.70299648 |
| chr6  | 2955802   | BAG6             | rs2295769   | T | C | 0.310345  | 0.0217462 | 0.70299648 |
| chr6  | 2955802   | APOM             | rs2295769   | T | C | 0.310345  | 0.0217462 | 0.70299648 |
| chr10 | 18828635  | CACNB2           | rs58225473  | T | G | 0.155172  | 0.0218274 | 0.70299648 |
| chr7  | 30831082  | FAM188B          | rs12701034  | C | T | 0.431034  | 0.0218528 | 0.70299648 |
| chr7  | 30831082  | INMT-<br>FAM188B | rs12701034  | C | T | 0.431034  | 0.0218528 | 0.70299648 |
| chrX  | 111698440 | ZCCHC16          | rs7474140   | G | T | 0.183908  | 0.0218675 | 0.70299648 |
| chr3  | 142178144 | ATR              | rs2229032   | C | T | 0.149425  | 0.021917  | 0.70299648 |
| chr14 | 105408827 | AHNAK2           | rs11850949  | A | C | 0.5       | 0.0219672 | 0.70299648 |
| chr11 | 309127    | IFITM2           | rs1059091   | A | G | 0.356322  | 0.0219754 | 0.70299648 |
| chr22 | 43572354  | TTLL12           | rs11704935  | C | T | 0.12069   | 0.0219817 | 0.70299648 |
| chr6  | 90448092  | MDN1             | rs4140446   | C | T | 0.856322  | 0.0220058 | 0.70299648 |
| chr19 | 12921186  | RNASEH2A         | rs7247284   | T | C | 0.0517241 | 0.0220499 | 0.70299648 |
| chr15 | 85401259  | ALPK3            | rs306197    | C | T | 0.752874  | 0.022079  | 0.70299648 |
| chr2  | 241569692 | GPR35            | rs3749171   | C | T | 0.16092   | 0.0220827 | 0.70299648 |
| chr5  | 140559320 | PCDHB8           | rs17844498  | G | A | 0.408046  | 0.0220908 | 0.70299648 |
| chr12 | 971291    | WNK1             | rs2286007   | C | T | 0.0977011 | 0.0221186 | 0.70299648 |
| chr10 | 102770082 | PDZD7            | rs807023    | T | G | 0.810345  | 0.0221517 | 0.70299648 |
| chr19 | 5893058   | NDUFA11          | rs12980262  | G | A | 0.126437  | 0.0222186 | 0.70299648 |
| chr11 | 47640429  | MTCH2            | rs1064608   | G | C | 0.304598  | 0.0222371 | 0.70299648 |

|       |           |          |             |   |    |           |           |            |
|-------|-----------|----------|-------------|---|----|-----------|-----------|------------|
| chr5  | 44809162  | MRPS30   | rs3747479   | G | C  | 0.373563  | 0.0222506 | 0.70299648 |
| chr6  | 83838673  | DOPEY1   | rs4706980   | G | A  | 0.132184  | 0.0223728 | 0.70531915 |
| chr3  | 137787047 | DZIP1L   | rs374045    | C | T  | 0.87931   | 0.022447  | 0.70531915 |
| chr3  | 137787192 | DZIP1L   | rs446644    | T | C  | 0.87931   | 0.022447  | 0.70531915 |
| chr10 | 99531571  | SFRP5    | rs11815012  | C | G  | 0.804598  | 0.0225328 | 0.70672547 |
| chr10 | 51568378  | NCOA4    | rs10761581  | T | G  | 0.373563  | 0.0226283 | 0.70843036 |
| chr10 | 115393929 | NRAP     | rs3189030   | G | A  | 0.304598  | 0.0226868 | 0.70853883 |
| chr2  | 167279922 | SCN7A    | rs6738031   | C | A  | 0.672414  | 0.0227405 | 0.70853883 |
| chrX  | 23928489  | CXorf58  | rs2707164   | C | T  | 0.528736  | 0.0228153 | 0.70853883 |
| chr11 | 56409603  | OR5AP2   | rs11606499  | C | T  | 0.103448  | 0.0228742 | 0.70853883 |
| chr17 | 80789628  | ZNF750   | rs8074277   | T | C  | 0.218391  | 0.0229271 | 0.70853883 |
| chr12 | 53227803  | KRT79    | rs2638497   | A | G  | 0.545977  | 0.0229663 | 0.70853883 |
| chr3  | 98110406  | OR5K3    | rs144759043 | G | GA | 0.557471  | 0.0230105 | 0.70853883 |
| chr11 | 118890022 | TRAPPC4  | rs3802881   | C | T  | 0.0977011 | 0.0230357 | 0.70853883 |
| chr2  | 152322095 | RIF1     | rs2444257   | A | T  | 0.678161  | 0.0230456 | 0.70853883 |
| chr2  | 152331418 | RIF1     | rs1065177   | C | G  | 0.678161  | 0.0230456 | 0.70853883 |
| chr17 | 17696755  | RAI1     | rs11649804  | C | A  | 0.327586  | 0.0230844 | 0.70853883 |
| chr12 | 104139034 | STAB2    | rs7306642   | C | A  | 0.0977011 | 0.0232952 | 0.71373674 |
| chr3  | 37476427  | C3orf35  | rs17266511  | C | T  | 0.0862069 | 0.0233737 | 0.71417739 |
| chr2  | 167334085 | SCN7A    | rs7565062   | G | T  | 0.683908  | 0.0235027 | 0.71417739 |
| chr1  | 159854251 | CCDC19   | rs16842789  | T | C  | 0.091954  | 0.0235072 | 0.71417739 |
| chr9  | 100388197 | TSTD2    | rs2773347   | C | T  | 0.637931  | 0.0235395 | 0.71417739 |
| chr17 | 56584508  | MTMR4    | rs2302190   | T | C  | 0.206897  | 0.0237162 | 0.71417739 |
| chr17 | 56618030  | SEPT4    | rs8073754   | C | T  | 0.206897  | 0.0237162 | 0.71417739 |
| chr13 | 52603896  | UTP14C   | rs17402034  | G | A  | 0.109195  | 0.0237318 | 0.71417739 |
| chr11 | 62294309  | AHNAK    | rs141117375 | C | T  | 0.0574713 | 0.0237928 | 0.71417739 |
| chr2  | 29416481  | ALK      | rs1881420   | T | C  | 0.252874  | 0.0238516 | 0.71417739 |
| chr1  | 159752066 | DUSP23   | rs1129923   | G | A  | 0.109195  | 0.0238635 | 0.71417739 |
| chr10 | 72500763  | ADAMTS14 | rs10823607  | T | C  | 0.804598  | 0.0239006 | 0.71417739 |
| chr17 | 17696531  | RAI1     | rs3803763   | G | C  | 0.333333  | 0.0239154 | 0.71417739 |
| chr8  | 120429024 | NOV      | rs2279112   | G | A  | 0.264368  | 0.0239246 | 0.71417739 |

|       |           |             |             |   |            |           |           |            |
|-------|-----------|-------------|-------------|---|------------|-----------|-----------|------------|
| chr10 | 81371729  | SFTPA1      | rs1136450   | C | G          | 0.591954  | 0.0239518 | 0.71417739 |
| chr10 | 115392919 | NRAP        | rs2270182   | T | A          | 0.293103  | 0.0239705 | 0.71417739 |
| chr17 | 27044482  | RAB34       | rs11545700  | C | A          | 0.149425  | 0.0239732 | 0.71417739 |
| chr11 | 4967468   | OR51A4      | rs28698374  | G | A          | 0.821839  | 0.0240361 | 0.71481452 |
| chr16 | 863498    | PRR25       | rs13333991  | G | C          | 0.0517241 | 0.0241739 | 0.71500718 |
| chr1  | 12854530  | PRAMEF1     | rs1063776   | C | G          | 0.87931   | 0.0241786 | 0.71500718 |
| chr10 | 101977883 | CHUK        | rs2230804   | C | T          | 0.454023  | 0.0242217 | 0.71500718 |
| chr7  | 126542667 | GRM8        | rs78124913  | A | T          | 0.132184  | 0.0242387 | 0.71500718 |
| chr6  | 152469188 | SYNE1       | rs2252755   | C | G          | 0.37931   | 0.0242502 | 0.71500718 |
| chr2  | 43452618  | ZFP36L2     | rs11675632  | C | T          | 0.0517241 | 0.0243463 | 0.71506707 |
| chr2  | 159663616 | DAPL1       | rs12535     | G | A          | 0.321839  | 0.024569  | 0.71506707 |
| chr22 | 21384578  | SLC7A4      | rs2270384   | C | T          | 0.091954  | 0.0246491 | 0.71506707 |
| chr22 | 21386019  | SLC7A4      | rs2072550   | G | A          | 0.091954  | 0.0246491 | 0.71506707 |
| chr18 | 44560429  | TCEB3B      | rs892586    | C | A          | 0.563218  | 0.0246616 | 0.71506707 |
| chr17 | 39619186  | KRT32       | rs2604956   | G | C          | 0.114943  | 0.0246889 | 0.71506707 |
| chr11 | 123624658 | OR6X1       | rs12364099  | G | T          | 0.166667  | 0.0247018 | 0.71506707 |
| chr11 | 66468469  | SPTBN2      | rs506028    | A | G          | 0.0689655 | 0.0247503 | 0.71506707 |
| chr22 | 31535995  | PLA2G3      | rs2074734   | C | G          | 0.0689655 | 0.024874  | 0.71506707 |
| chr16 | 2155426   | PKD1        | rs9936785   | T | C          | 0.126437  | 0.0249669 | 0.71506707 |
| chr2  | 101925026 | RNF149      | rs11123868  | T | C          | 0.37931   | 0.0250253 | 0.71506707 |
| chr17 | 39659913  | KRT13       | rs9891361   | G | A          | 0.885057  | 0.0250258 | 0.71506707 |
| chr12 | 52631313  | KRT7        | rs6580870   | A | G          | 0.833333  | 0.0250769 | 0.71506707 |
| chr16 | 14988868  | NOMO1       | rs62038492  | A | G          | 0.454023  | 0.0251857 | 0.71506707 |
| chr19 | 3820191   | ZFR2        | rs2301843   | C | T          | 0.362069  | 0.0252538 | 0.71506707 |
| chr19 | 10224526  | P2RY11      | rs3745600   | C | T          | 0.436782  | 0.0252685 | 0.71506707 |
| chr19 | 10224526  | PPAN-P2RY11 | rs3745600   | C | T          | 0.436782  | 0.0252685 | 0.71506707 |
| chr1  | 117656088 | TRIM45      | rs1289658   | A | G          | 0.408046  | 0.0254331 | 0.71506707 |
| chr14 | 21215923  | EDDM3A      | rs34552133  | G | T          | 0.0977011 | 0.0254787 | 0.71506707 |
| chr17 | 46608184  | HOXB1       | rs145570960 | G | GGGGCGCTGT | 0.149425  | 0.0255473 | 0.71506707 |
| chr19 | 35757427  | LSR         | rs34259399  | G | A          | 0.126437  | 0.0256257 | 0.71506707 |
| chr5  | 36985303  | NIPBL       | rs3822471   | A | G          | 0.091954  | 0.0257093 | 0.71506707 |

|       |           |          |             |      |   |           |           |            |
|-------|-----------|----------|-------------|------|---|-----------|-----------|------------|
| chr7  | 149462381 | ZNF467   | rs112589121 | C    | T | 0.0689655 | 0.0257547 | 0.71506707 |
| chr5  | 146460691 | PPP2R2B  | rs17524553  | T    | A | 0.114943  | 0.0258239 | 0.71506707 |
| chr8  | 27308585  | PTK2B    | rs751019    | A    | C | 0.408046  | 0.0258522 | 0.71506707 |
| chr19 | 50360989  | PTOV1    | rs59595912  | A    | G | 0.0689655 | 0.0258656 | 0.71506707 |
| chr10 | 71164655  | TACR2    | rs2229170   | C    | T | 0.178161  | 0.0260823 | 0.71506707 |
| chr17 | 4461748   | GGT6     | rs7215121   | G    | A | 0.396552  | 0.0260884 | 0.71506707 |
| chr16 | 53481010  | RBL2     | rs17800727  | A    | G | 0.264368  | 0.0261584 | 0.71506707 |
| chr6  | 28294550  | ZNF323   | rs853684    | T    | C | 0.367816  | 0.0262389 | 0.71506707 |
| chr19 | 43244485  | PSG3     | rs11880551  | G    | C | 0.132184  | 0.0262941 | 0.71506707 |
| chr1  | 154516477 | TDRD10   | rs12750774  | G    | A | 0.281609  | 0.0263    | 0.71506707 |
| chr1  | 202183308 | LGR6     | rs10920362  | C    | T | 0.477011  | 0.0263405 | 0.71506707 |
| chr20 | 3204084   | ITPA     | rs9101      | G    | A | 0.344828  | 0.0263945 | 0.71506707 |
| chr1  | 21024901  | KIF17    | rs522496    | C    | T | 0.678161  | 0.0264099 | 0.71506707 |
| chr3  | 128204951 | GATA2    | rs2335052   | C    | T | 0.172414  | 0.0264425 | 0.71506707 |
| chr3  | 122296647 | PARP15   | rs7632426   | G    | A | 0.091954  | 0.0264664 | 0.71506707 |
| chr7  | 16460893  | ISPD     | rs7782939   | T    | G | 0.304598  | 0.02647   | 0.71506707 |
| chr17 | 18023897  | MYO15A   | rs2955365   | G    | A | 0.264368  | 0.0264702 | 0.71506707 |
| chr11 | 60718792  | SLC15A3  | rs150370599 | C    | T | 0.0862069 | 0.0265062 | 0.71506707 |
| chr9  | 113196733 | SVEP1    | rs7852962   | A    | C | 0.155172  | 0.0265499 | 0.71506707 |
| chr9  | 113221247 | SVEP1    | rs7038903   | T    | C | 0.155172  | 0.0265499 | 0.71506707 |
| chr1  | 165532746 | LRRCS2   | rs17407838  | T    | A | 0.114943  | 0.02657   | 0.71506707 |
| chr19 | 6901891   | EMR1     | rs897738    | G    | A | 0.252874  | 0.0266954 | 0.71506707 |
| chr19 | 6903920   | EMR1     | rs443658    | A    | G | 0.252874  | 0.0266954 | 0.71506707 |
| chr19 | 6904137   | EMR1     | rs370094    | C    | T | 0.252874  | 0.0266954 | 0.71506707 |
| chr6  | 150240829 | RAET1G   | rs9397449   | G    | C | 0.12069   | 0.0267337 | 0.71506707 |
| chr19 | 37854580  | HKR1     | rs3745764   | C    | T | 0.252874  | 0.026741  | 0.71506707 |
| chr14 | 77493791  | IRF2BPL  | rs773628724 | CTGT | C | 0.494253  | 0.0268427 | 0.71506707 |
| chr1  | 27278573  | C1orf172 | rs17360994  | T    | C | 0.0804598 | 0.0268641 | 0.71506707 |
| chr1  | 27239920  | NR0B2    | rs6659176   | C    | G | 0.0804598 | 0.0268641 | 0.71506707 |
| chr19 | 52249211  | FPR1     | rs867228    | T    | G | 0.804598  | 0.0268872 | 0.71506707 |
| chr14 | 105414238 | AHNAK2   | rs60754080  | C    | A | 0.482759  | 0.0269601 | 0.71506707 |

|       |           |         |             |   |   |           |           |            |
|-------|-----------|---------|-------------|---|---|-----------|-----------|------------|
| chr12 | 5841733   | ANO2    | rs1860961   | A | C | 0.0804598 | 0.0269655 | 0.71506707 |
| chr15 | 91543761  | VPS33B  | rs11073964  | C | T | 0.511494  | 0.0269738 | 0.71506707 |
| chr14 | 24458211  | DHRS4L2 | rs2273947   | A | T | 0.091954  | 0.0269759 | 0.71506707 |
| chr22 | 19119751  | DGCR14  | rs1052763   | C | T | 0.16092   | 0.0270556 | 0.71506707 |
| chr22 | 19119751  | TSSK2   | rs1052763   | C | T | 0.16092   | 0.0270556 | 0.71506707 |
| chr6  | 116600774 | TSPYL1  | rs3749895   | C | G | 0.264368  | 0.0271428 | 0.71506707 |
| chr9  | 35606884  | TESK1   | rs2275422   | G | A | 0.482759  | 0.0272307 | 0.71506707 |
| chr2  | 30980940  | CAPN13  | rs508405    | C | T | 0.678161  | 0.0272889 | 0.71506707 |
| chr2  | 74692191  | MOGS    | rs79181168  | C | T | 0.0632184 | 0.0272946 | 0.71506707 |
| chr11 | 75378674  | MAP6    | rs12225010  | A | C | 0.591954  | 0.027302  | 0.71506707 |
| chr3  | 99886662  | C3orf26 | rs11537816  | G | A | 0.218391  | 0.0273161 | 0.71506707 |
| chr18 | 60383787  | PHLPP1  | rs187210763 | T | G | 0.0574713 | 0.0273932 | 0.71506707 |
| chr18 | 60383982  | PHLPP1  | rs12957017  | G | A | 0.0574713 | 0.0273932 | 0.71506707 |
| chr19 | 9024994   | MUC16   | rs67631215  | C | T | 0.327586  | 0.0274067 | 0.71506707 |
| chr18 | 47908556  | SKA1    | rs6507992   | G | A | 0.637931  | 0.0274988 | 0.71506707 |
| chr1  | 149906413 | MTMR11  | rs11205303  | T | C | 0.390805  | 0.027527  | 0.71506707 |
| chr16 | 58019396  | TEPP    | rs9934227   | G | A | 0.816092  | 0.0275474 | 0.71506707 |
| chr20 | 36932660  | BPI     | rs1341023   | C | T | 0.557471  | 0.0275847 | 0.71506707 |
| chr2  | 55404794  | C2orf63 | rs14026     | G | A | 0.534483  | 0.0276096 | 0.71506707 |
| chr7  | 123256427 | ASB15   | rs6962756   | C | T | 0.672414  | 0.0276705 | 0.71506707 |
| chr1  | 175375469 | TNR     | rs2239819   | C | A | 0.293103  | 0.027696  | 0.71506707 |
| chr22 | 32871383  | FBXO7   | rs8137714   | T | G | 0.241379  | 0.0277422 | 0.71506707 |
| chr7  | 50173777  | C7orf72 | rs998928    | A | G | 0.396552  | 0.0277429 | 0.71506707 |
| chr11 | 102272884 | TMEM123 | rs2155587   | C | T | 0.109195  | 0.0277704 | 0.71506707 |
| chr7  | 144094613 | NOBOX   | rs1208216   | G | T | 0.143678  | 0.0278295 | 0.71506707 |
| chr7  | 144096068 | NOBOX   | rs2525702   | C | T | 0.143678  | 0.0278295 | 0.71506707 |
| chr5  | 122435627 | PRDM6   | rs1008058   | G | A | 0.0804598 | 0.0279258 | 0.71506707 |
| chr4  | 187629770 | FAT1    | rs3733414   | A | C | 0.609195  | 0.0279642 | 0.71506707 |
| chr1  | 179989742 | CEP350  | rs2477120   | G | C | 0.62069   | 0.0280108 | 0.71506707 |
| chr10 | 103920475 | NOLC1   | rs1049455   | T | C | 0.114943  | 0.0280902 | 0.71506707 |
| chr20 | 2559795   | TMC2    | rs34884202  | T | C | 0.0689655 | 0.0281019 | 0.71506707 |

|       |           |            |             |         |   |           |           |            |
|-------|-----------|------------|-------------|---------|---|-----------|-----------|------------|
| chr6  | 112671611 | RFPL4B     | rs11153361  | G       | A | 0.229885  | 0.0281454 | 0.71506707 |
| chr2  | 178482594 | TTC30A     | rs61742858  | G       | T | 0.132184  | 0.0281584 | 0.71506707 |
| chr17 | 72308319  | DNAI2      | rs1979370   | G       | A | 0.91954   | 0.0281939 | 0.71506707 |
| chr1  | 19228971  | ALDH4A1    | rs146450609 | G       | A | 0.0574713 | 0.0281995 | 0.71506707 |
| chr5  | 140574169 | PCDHB10    | rs140613424 | CAGGCCG | C | 0.344828  | 0.0282517 | 0.71506707 |
| chr4  | 110901198 | EGF        | rs2237051   | G       | A | 0.396552  | 0.028336  | 0.71506707 |
| chr19 | 14141666  | RLN3       | rs78161395  | G       | T | 0.132184  | 0.0283392 | 0.71506707 |
| chr1  | 98165091  | DPYD       | rs2297595   | T       | C | 0.0517241 | 0.0284541 | 0.71506707 |
| chrX  | 48418126  | TBC1D25    | rs2293948   | A       | G | 0.304598  | 0.0284761 | 0.71506707 |
| chrX  | 48418659  | TBC1D25    | rs235836    | G       | A | 0.304598  | 0.0284761 | 0.71506707 |
| chr19 | 53667804  | ZNF665     | rs4801958   | C       | T | 0.637931  | 0.0285    | 0.71506707 |
| chr19 | 53669492  | ZNF665     | rs12460170  | A       | G | 0.637931  | 0.0285    | 0.71506707 |
| chr11 | 5701074   | TRIM5      | rs11601507  | C       | A | 0.0804598 | 0.0285514 | 0.71506707 |
| chr12 | 21011480  | SLCO1B3    | rs4149117   | T       | G | 0.890805  | 0.0285709 | 0.71506707 |
| chr12 | 21015760  | SLCO1B3    | rs7311358   | G       | A | 0.890805  | 0.0285709 | 0.71506707 |
| chr2  | 160676427 | LY75       | rs12692566  | C       | A | 0.764368  | 0.028691  | 0.71506707 |
| chr2  | 160676427 | LY75-CD302 | rs12692566  | C       | A | 0.764368  | 0.028691  | 0.71506707 |
| chr10 | 74894375  | ECD        | rs2271904   | T       | C | 0.0689655 | 0.0287039 | 0.71506707 |
| chr10 | 74896664  | ECD        | rs36152134  | T       | C | 0.0689655 | 0.0287039 | 0.71506707 |
| chrX  | 1531687   | ASMTL      | rs79968027  | T       | C | 0.0747126 | 0.0288162 | 0.71506707 |
| chrX  | 1531687   | ASMTL-AS1  | rs79968027  | T       | C | 0.0747126 | 0.0288162 | 0.71506707 |
| chr19 | 57649900  | ZIM3       | rs2370134   | C       | T | 0.178161  | 0.028834  | 0.71506707 |
| chr12 | 95681597  | VEZT       | rs10507051  | G       | A | 0.0632184 | 0.0288453 | 0.71506707 |
| chr12 | 52639302  | KRT7       | rs2608009   | G       | C | 0.83908   | 0.0288677 | 0.71506707 |
| chr11 | 67809268  | TCIRG1     | rs36027301  | C       | T | 0.0689655 | 0.0289059 | 0.71506707 |
| chr2  | 95537622  | TEKT4      | rs11164112  | A       | G | 0.413793  | 0.0289446 | 0.71506707 |
| chr7  | 36656035  | AOAH       | rs3735386   | G       | C | 0.109195  | 0.0290071 | 0.71506707 |
| chr10 | 129905896 | MKI67      | rs3740423   | T       | A | 0.189655  | 0.0290316 | 0.71506707 |
| chr5  | 34840841  | TTC23L     | rs6451173   | A       | G | 0.5       | 0.0290569 | 0.71506707 |
| chr13 | 111119396 | COL4A2     | rs3803230   | G       | C | 0.0747126 | 0.0290904 | 0.71506707 |
| chr18 | 66542006  | CCDC102B   | rs745894    | G       | T | 0.195402  | 0.0291494 | 0.71506707 |

|       |           |          |             |      |         |           |           |            |
|-------|-----------|----------|-------------|------|---------|-----------|-----------|------------|
| chr19 | 48800914  | CCDC114  | rs35461177  | G    | A       | 0.270115  | 0.0292341 | 0.71506707 |
| chr1  | 207074905 | IL24     | rs1150258   | T    | C       | 0.436782  | 0.0292402 | 0.71506707 |
| chr10 | 5138747   | AKR1C3   | rs11551177  | A    | G       | 0.0574713 | 0.0292418 | 0.71506707 |
| chr21 | 43824106  | UBASH3A  | rs2277798   | A    | G       | 0.58046   | 0.0293762 | 0.71506707 |
| chr15 | 91326099  | BLM      | rs2227935   | C    | T       | 0.0689655 | 0.0294313 | 0.71506707 |
| chr15 | 91354521  | BLM      | rs7167216   | G    | A       | 0.0689655 | 0.0294313 | 0.71506707 |
| chr6  | 30993776  | PBMUCL1  | rs115709409 | A    | T       | 0.114943  | 0.0294336 | 0.71506707 |
| chr1  | 14105139  | PRDM2    | rs2076324   | T    | A       | 0.293103  | 0.0294696 | 0.71506707 |
| chr16 | 88779739  | CTU2     | rs11549837  | A    | G       | 0.356322  | 0.0294882 | 0.71506707 |
| chr5  | 140580931 | PCDHB11  | rs799834    | C    | G       | 0.41954   | 0.0294973 | 0.71506707 |
| chr5  | 140559532 | PCDHB8   | rs2740582   | G    | C       | 0.413793  | 0.0295508 | 0.71506707 |
| chr9  | 117846580 | TNC      | rs1061494   | T    | C       | 0.402299  | 0.0296104 | 0.71506707 |
| chr16 | 67964203  | CTRL     | rs1134760   | T    | C       | 0.143678  | 0.0297491 | 0.71506707 |
| chr1  | 228558892 | OBSCN    | rs35186354  | C    | T       | 0.103448  | 0.0297987 | 0.71506707 |
| chr8  | 70980738  | PRDM14   | rs3750228   | T    | C       | 0.149425  | 0.0298026 | 0.71506707 |
| chr11 | 68678962  | IGHMBP2  | rs560096    | T    | C       | 0.867816  | 0.0298495 | 0.71506707 |
| chr5  | 475104    | SLC9A3   | rs2247114   | A    | G       | 0.850575  | 0.0299125 | 0.71506707 |
| chr17 | 53076799  | STXBP4   | rs1156287   | G    | A       | 0.793103  | 0.0299607 | 0.71506707 |
| chr12 | 88380094  | C12orf50 | rs10777084  | T    | C       | 0.103448  | 0.0300068 | 0.71506707 |
| chr4  | 2951804   | NOP14    | rs2515960   | A    | G       | 0.344828  | 0.030069  | 0.71506707 |
| chr18 | 11689669  | GNAL     | rs201898548 | C    | CGGCCCT | 0.178161  | 0.0300815 | 0.71506707 |
| chr7  | 149486294 | SSPO     | rs855691    | A    | G       | 0.0747126 | 0.0301071 | 0.71506707 |
| chr7  | 149486382 | SSPO     | rs2074704   | C    | G       | 0.0747126 | 0.0301071 | 0.71506707 |
| chr7  | 149489491 | SSPO     | rs1076277   | C    | T       | 0.0747126 | 0.0301071 | 0.71506707 |
| chr11 | 58170792  | OR5B3    | rs200799158 | AG   | A       | 0.0632184 | 0.0301355 | 0.71506707 |
| chr20 | 46279836  | NCOA3    | rs147879509 | ACAG | A       | 0.321839  | 0.0302842 | 0.71506707 |
| chr10 | 7749183   | ITIH2    | rs73621253  | C    | T       | 0.0977011 | 0.0303033 | 0.71506707 |
| chr22 | 22989256  | GGTLC2   | rs2904923   | A    | G       | 0.867816  | 0.0303129 | 0.71506707 |
| chr1  | 169511555 | F5       | rs6032      | T    | C       | 0.270115  | 0.0303806 | 0.71506707 |
| chr1  | 169511734 | F5       | rs4525      | T    | C       | 0.270115  | 0.0303806 | 0.71506707 |
| chr1  | 169511755 | F5       | rs4524      | T    | C       | 0.270115  | 0.0303806 | 0.71506707 |

|       |           |          |             |   |      |           |           |            |
|-------|-----------|----------|-------------|---|------|-----------|-----------|------------|
| chr5  | 140590766 | PCDHB12  | rs2910006   | A | G    | 0.362069  | 0.030418  | 0.71506707 |
| chr5  | 140595106 | PCDHB13  | rs2910329   | C | G    | 0.362069  | 0.030418  | 0.71506707 |
| chr2  | 242011084 | SNED1    | rs17440466  | T | C    | 0.0747126 | 0.0304453 | 0.71506707 |
| chr19 | 44471209  | ZNF221   | rs365745    | T | A    | 0.798851  | 0.0304814 | 0.71506707 |
| chr19 | 18375882  | KIAA1683 | rs12608777  | G | C    | 0.149425  | 0.0307347 | 0.71570947 |
| chr19 | 18377761  | KIAA1683 | rs12609001  | A | G    | 0.149425  | 0.0307347 | 0.71570947 |
| chr17 | 39577215  | KRT37    | rs8071814   | G | A    | 0.0862069 | 0.0308164 | 0.71570947 |
| chr11 | 56468720  | OR9G9    | rs66943455  | T | C    | 0.482759  | 0.0308261 | 0.71570947 |
| chr11 | 56468720  | OR9G1    | rs66943455  | T | C    | 0.482759  | 0.0308261 | 0.71570947 |
| chr10 | 126172863 | LHPP     | rs6597801   | A | G    | 0.862069  | 0.0308392 | 0.71570947 |
| chr1  | 16727305  | SPATA21  | rs139527123 | G | GCTT | 0.149425  | 0.0308998 | 0.71570947 |
| chr22 | 43579083  | TLL12    | rs138951    | G | A    | 0.103448  | 0.0309133 | 0.71570947 |
| chr11 | 56185159  | OR5R1    | rs7930678   | A | G    | 0.206897  | 0.030966  | 0.71570947 |
| chr11 | 56185327  | OR5R1    | rs7933772   | T | C    | 0.206897  | 0.030966  | 0.71570947 |
| chr11 | 56185689  | OR5R1    | rs7931261   | A | G    | 0.206897  | 0.030966  | 0.71570947 |
| chr12 | 129189941 | TMEM132C | rs12424159  | G | A    | 0.626437  | 0.0310883 | 0.7160279  |
| chr15 | 30018627  | TJP1     | rs2229515   | T | C    | 0.114943  | 0.0310949 | 0.7160279  |
| chr1  | 151881885 | THEM4    | rs3748805   | A | C    | 0.873563  | 0.0311144 | 0.7160279  |
| chr19 | 10273372  | DNMT1    | rs2228612   | T | C    | 0.091954  | 0.0311986 | 0.7160279  |
| chr14 | 105416872 | AHNAK2   | rs148787429 | T | C    | 0.0574713 | 0.0312402 | 0.7160279  |
| chr6  | 29274486  | OR14J1   | rs9257694   | T | C    | 0.505747  | 0.0312556 | 0.7160279  |
| chr17 | 15234895  | TEKT3    | rs7226363   | C | T    | 0.224138  | 0.0313044 | 0.7160279  |
| chr19 | 42085873  | CEACAM21 | rs2302188   | A | G    | 0.747126  | 0.0313266 | 0.7160279  |
| chr14 | 105410411 | AHNAK2   | rs11160825  | C | T    | 0.494253  | 0.0314489 | 0.7160279  |
| chr6  | 29407970  | OR10C1   | rs2074469   | T | C    | 0.201149  | 0.031476  | 0.7160279  |
| chr11 | 8662516   | TRIM66   | rs11042023  | T | C    | 0.614943  | 0.0315623 | 0.7160279  |
| chr16 | 29908433  | SEZ6L2   | rs11649499  | C | G    | 0.83908   | 0.0315872 | 0.7160279  |
| chr12 | 6711147   | CHD4     | rs1639122   | C | A    | 0.413793  | 0.0317151 | 0.7160279  |
| chr4  | 178256913 | NEIL3    | rs7689099   | C | G    | 0.12069   | 0.0317278 | 0.7160279  |
| chr2  | 216923679 | PECR     | rs1429148   | C | T    | 0.0804598 | 0.0317304 | 0.7160279  |
| chr16 | 89180883  | ACSF3    | rs3743979   | G | A    | 0.718391  | 0.0317564 | 0.7160279  |

|       |           |                  |             |            |   |           |           |            |
|-------|-----------|------------------|-------------|------------|---|-----------|-----------|------------|
| chr17 | 79986156  | LRR45            | rs72861736  | C          | T | 0.0862069 | 0.0317921 | 0.7160279  |
| chr5  | 179740827 | GFPT2            | rs2303007   | T          | C | 0.206897  | 0.0318342 | 0.7160279  |
| chr22 | 31621792  | LIMK2            | rs5997917   | G          | A | 0.166667  | 0.0318396 | 0.7160279  |
| chr1  | 3413868   | MEGF6            | rs4648506   | C          | G | 0.252874  | 0.031844  | 0.7160279  |
| chr13 | 25075864  | PARP4            | rs35200240  | T          | C | 0.0804598 | 0.0319119 | 0.7160279  |
| chr16 | 77359919  | ADAMTS18         | rs11640912  | A          | T | 0.402299  | 0.0319309 | 0.7160279  |
| chr5  | 140778256 | PCDHGB5          | rs6867460   | G          | A | 0.143678  | 0.0319362 | 0.7160279  |
| chr9  | 94486321  | ROR2             | rs10761129  | C          | T | 0.735632  | 0.0319938 | 0.71638653 |
| chr1  | 228504591 | OBSCN            | rs61825301  | C          | A | 0.149425  | 0.0322524 | 0.71872683 |
| chr1  | 228505739 | OBSCN            | rs3795801   | G          | A | 0.149425  | 0.0322524 | 0.71872683 |
| chr6  | 29012067  | LOC10012963<br>6 | rs35771565  | C          | T | 0.172414  | 0.0323545 | 0.71872683 |
| chr6  | 29012067  | OR2W1            | rs35771565  | C          | T | 0.172414  | 0.0323545 | 0.71872683 |
| chr6  | 29080349  | OR2J3            | rs3130764   | A          | G | 0.827586  | 0.0323638 | 0.71872683 |
| chr16 | 633353    | PIGQ             | rs710924    | T          | C | 0.362069  | 0.0323905 | 0.71872683 |
| chr16 | 633354    | PIGQ             | rs710925    | G          | A | 0.362069  | 0.0323905 | 0.71872683 |
| chr1  | 50666515  | ELAVL4           | rs2494876   | C          | T | 0.936782  | 0.0324674 | 0.719506   |
| chr4  | 187629538 | FAT1             | rs3733413   | C          | T | 0.545977  | 0.032517  | 0.71967895 |
| chr18 | 5890571   | TMEM200C         | rs7506026   | T          | C | 0.0977011 | 0.0326276 | 0.7197564  |
| chr15 | 89836228  | FANCI            | rs2283432   | G          | C | 0.350575  | 0.0326858 | 0.7197564  |
| chr5  | 79734297  | ZFYVE16          | rs259028    | T          | C | 0.91954   | 0.0326877 | 0.7197564  |
| chr5  | 79745469  | ZFYVE16          | rs249038    | A          | G | 0.91954   | 0.0326877 | 0.7197564  |
| chr3  | 118621500 | IGSF11           | rs34908332  | C          | T | 0.109195  | 0.0327779 | 0.72018468 |
| chr4  | 2943361   | NOP14            | rs1054090   | T          | C | 0.333333  | 0.0327908 | 0.72018468 |
| chr14 | 105413204 | AHNAK2           | rs2582514   | G          | T | 0.494253  | 0.0329845 | 0.72203796 |
| chr17 | 15496727  | CDRT1            | rs79385100  | T          | G | 0.126437  | 0.0330048 | 0.72203796 |
| chr5  | 132652281 | FSTL4            | rs17683306  | C          | T | 0.109195  | 0.0331632 | 0.72203796 |
| chr10 | 95381773  | PDE6C            | rs701865    | T          | A | 0.344828  | 0.0332473 | 0.72203796 |
| chr3  | 97983487  | OR5H6            | rs398062605 | TTGTAACCAC | T | 0.557471  | 0.0332514 | 0.72203796 |
| chr3  | 97983981  | OR5H6            | rs9871143   | G          | A | 0.557471  | 0.0332514 | 0.72203796 |
| chr14 | 24587639  | DCAF11           | rs3825584   | G          | A | 0.298851  | 0.0332659 | 0.72203796 |

|       |           |          |             |   |   |           |           |            |
|-------|-----------|----------|-------------|---|---|-----------|-----------|------------|
| chr12 | 109017898 | SELPLG   | rs2228315   | C | T | 0.0862069 | 0.0333748 | 0.72203796 |
| chr20 | 210306    | DEFB129  | rs1053783   | C | G | 0.155172  | 0.0333759 | 0.72203796 |
| chr15 | 45444133  | DUOX1    | rs16939752  | T | C | 0.12069   | 0.0335349 | 0.72203796 |
| chr6  | 27925367  | OR2B6    | rs7767176   | G | A | 0.0977011 | 0.0335916 | 0.72203796 |
| chr1  | 247875415 | OR6F1    | rs2282316   | A | G | 0.218391  | 0.0335954 | 0.72203796 |
| chr3  | 93780109  | DHFRL1   | rs61739170  | G | C | 0.201149  | 0.033601  | 0.72203796 |
| chr12 | 48272895  | VDR      | rs2228570   | A | G | 0.66092   | 0.0336298 | 0.72203796 |
| chr11 | 55606693  | OR5D16   | rs6591700   | G | A | 0.0862069 | 0.0336385 | 0.72203796 |
| chr17 | 18671961  | FBXW10   | rs79757327  | C | T | 0.0632184 | 0.0336752 | 0.72203796 |
| chr22 | 30856121  | SEC14L3  | rs35764129  | G | A | 0.0517241 | 0.0337038 | 0.72203796 |
| chr11 | 47857253  | NUP160   | rs3816605   | T | C | 0.465517  | 0.0337062 | 0.72203796 |
| chr4  | 95170839  | SMARCAD1 | rs11722476  | G | A | 0.37931   | 0.0337688 | 0.72203796 |
| chr19 | 38375666  | WDR87    | rs73027451  | C | T | 0.132184  | 0.033797  | 0.72203796 |
| chr17 | 9515777   | WDR16    | rs6503235   | G | A | 0.735632  | 0.0337977 | 0.72203796 |
| chr17 | 60814273  | MARCH10  | rs9891498   | A | G | 0.408046  | 0.0338492 | 0.7222421  |
| chr2  | 20870820  | GDF7     | rs78872016  | G | T | 0.0862069 | 0.0339098 | 0.72252412 |
| chr19 | 10114252  | COL5A3   | rs61742765  | C | G | 0.212644  | 0.0339883 | 0.72252412 |
| chr19 | 10114740  | COL5A3   | rs62104337  | T | A | 0.212644  | 0.0339883 | 0.72252412 |
| chr12 | 86373221  | MGAT4C   | rs17855890  | G | C | 0.0977011 | 0.034188  | 0.72587321 |
| chr9  | 127177161 | PSMB7    | rs4574      | A | G | 0.448276  | 0.0342734 | 0.72647583 |
| chr17 | 76503593  | DNAH17   | rs9896398   | T | C | 0.597701  | 0.0343429 | 0.72647583 |
| chr17 | 3657159   | ITGAE    | rs2272606   | C | T | 0.758621  | 0.0344045 | 0.72647583 |
| chr20 | 61513649  | DIDO1    | rs6011441   | G | T | 0.114943  | 0.0345332 | 0.72647583 |
| chr17 | 56435080  | RNF43    | rs9652855   | G | C | 0.126437  | 0.0345484 | 0.72647583 |
| chr16 | 701656    | WDR90    | rs11642546  | C | T | 0.218391  | 0.0345935 | 0.72647583 |
| chr16 | 2160973   | PKD1     | rs116092985 | A | G | 0.132184  | 0.0345951 | 0.72647583 |
| chr16 | 2162361   | PKD1     | rs2549677   | A | G | 0.132184  | 0.0345951 | 0.72647583 |
| chr21 | 43896143  | RSPH1    | rs117385282 | C | T | 0.201149  | 0.0346152 | 0.72647583 |
| chr2  | 228163453 | COL4A3   | rs57611801  | C | A | 0.0517241 | 0.0347682 | 0.72647583 |
| chr3  | 108298260 | KIAA1524 | rs2278911   | C | T | 0.103448  | 0.0347798 | 0.72647583 |
| chr15 | 78390414  | SH2D7    | rs2289524   | T | C | 0.41954   | 0.034798  | 0.72647583 |

|       |           |             |             |            |   |           |           |            |
|-------|-----------|-------------|-------------|------------|---|-----------|-----------|------------|
| chr11 | 62863518  | SLC22A24    | rs7113279   | A          | G | 0.603448  | 0.0348563 | 0.72647583 |
| chr1  | 6533393   | PLEKHG5     | rs61741379  | G          | C | 0.137931  | 0.0349112 | 0.72647583 |
| chr1  | 6184092   | CHD5        | rs2843493   | A          | G | 0.62069   | 0.0349127 | 0.72647583 |
| chr6  | 160952838 | LPA         | rs3124784   | G          | A | 0.281609  | 0.0349331 | 0.72647583 |
| chr16 | 88599659  | ZFPM1       | rs71395304  | G          | T | 0.12069   | 0.0349822 | 0.72647583 |
| chr22 | 23503121  | RAB36       | rs5759611   | G          | A | 0.247126  | 0.0349977 | 0.72647583 |
| chr4  | 38774889  | TLR10       | rs4129009   | T          | C | 0.126437  | 0.035018  | 0.72647583 |
| chr1  | 240255568 | FMN2        | rs140531536 | GGGC       | G | 0.781609  | 0.0352093 | 0.72951507 |
| chr22 | 20103263  | TRMT2A      | rs9605067   | G          | T | 0.0517241 | 0.0352579 | 0.72951507 |
| chr1  | 42047208  | HIVEP3      | rs17363472  | C          | G | 0.0689655 | 0.0353516 | 0.72951507 |
| chr14 | 105055118 | C14orf180   | rs111285011 | TGACGGGCAG | T | 0.465517  | 0.035357  | 0.72951507 |
| chr18 | 61602360  | SERPINB10   | rs35453062  | G          | A | 0.109195  | 0.0353798 | 0.72951507 |
| chr2  | 242046785 | PASK        | rs1131293   | A          | C | 0.0747126 | 0.0354187 | 0.72951507 |
| chr19 | 43680037  | PSG5        | rs1135901   | T          | A | 0.172414  | 0.035531  | 0.73008149 |
| chr19 | 43680269  | PSG5        | rs1058259   | G          | C | 0.172414  | 0.035531  | 0.73008149 |
| chr7  | 21775369  | DNAH11      | rs68023059  | G          | A | 0.0574713 | 0.0356353 | 0.73064865 |
| chr15 | 63597857  | APH1B       | rs1047552   | T          | G | 0.0689655 | 0.035652  | 0.73064865 |
| chr14 | 24845841  | NFATC4      | rs7149586   | T          | C | 0.701149  | 0.0356859 | 0.73064865 |
| chr8  | 90784979  | RIPK2       | rs2230801   | T          | C | 0.0574713 | 0.0357697 | 0.73149461 |
| chr15 | 93015427  | C15orf32    | rs1455773   | G          | A | 0.298851  | 0.035837  | 0.73152425 |
| chr19 | 29704010  | UQCRF51     | rs8100724   | A          | C | 0.896552  | 0.035887  | 0.73152425 |
| chr19 | 45655647  | NKPD1       | rs117934605 | G          | T | 0.114943  | 0.0358986 | 0.73152425 |
| chr9  | 113259152 | SVEP1       | rs10817033  | T          | G | 0.109195  | 0.0360575 | 0.73272024 |
| chr11 | 66033430  | KLC2        | rs2276036   | C          | T | 0.178161  | 0.0361019 | 0.73272024 |
| chr10 | 133795391 | BNIP3       | rs11556626  | A          | C | 0.126437  | 0.036133  | 0.73272024 |
| chr1  | 27332466  | FAM46B      | rs61737590  | T          | C | 0.0747126 | 0.0362352 | 0.73272024 |
| chr16 | 3339435   | ZNF263      | rs220379    | G          | C | 0.218391  | 0.0362941 | 0.73272024 |
| chr19 | 58355699  | LOC10029351 | rs8103104   | T          | C | 0.396552  | 0.036331  | 0.73272024 |
|       |           | 6           |             |            |   |           |           |            |
| chr6  | 168442765 | KIF25       | rs2073634   | G          | A | 0.103448  | 0.0363475 | 0.73272024 |
| chr5  | 140739779 | PCDHGB2     | rs17097231  | C          | G | 0.12069   | 0.0363813 | 0.73272024 |

|       |           |                    |             |      |      |           |           |            |
|-------|-----------|--------------------|-------------|------|------|-----------|-----------|------------|
| chr2  | 73716810  | ALMS1              | rs3820700   | G    | A    | 0.0977011 | 0.0364879 | 0.73272024 |
| chr2  | 73717103  | ALMS1              | rs2017116   | G    | C    | 0.0977011 | 0.0364879 | 0.73272024 |
| chr2  | 73675669  | ALMS1              | rs2037814   | T    | G    | 0.902299  | 0.0364997 | 0.73272024 |
| chr13 | 28552425  | PRHOXNB            | rs9579139   | G    | T    | 0.333333  | 0.0365656 | 0.73272024 |
| chr7  | 149523195 | SSPO               | rs78492471  | C    | G    | 0.091954  | 0.0366101 | 0.73272024 |
| chr3  | 98073591  | OR5K4              | rs11288615  | TA   | T    | 0.563218  | 0.0366539 | 0.73272024 |
| chr1  | 47016761  | KNCN               | rs61997191  | C    | T    | 0.0517241 | 0.0366995 | 0.73272024 |
| chr4  | 88583135  | DMP1               | rs10019009  | A    | T    | 0.247126  | 0.0367183 | 0.73272024 |
| chr14 | 35735967  | KIAA0391           | rs11156878  | A    | G    | 0.172414  | 0.0368318 | 0.73272024 |
| chr22 | 21354970  | THAP7              | rs426938    | C    | G    | 0.798851  | 0.036832  | 0.73272024 |
| chr18 | 33831189  | MOCOS              | rs594445    | C    | A    | 0.275862  | 0.0368795 | 0.73272024 |
| chr4  | 1843324   | LETM1              | rs116753949 | C    | T    | 0.103448  | 0.0369127 | 0.73272024 |
| chr20 | 44520237  | CTSA               | rs540291608 | CCTG | C    | 0.637931  | 0.0369388 | 0.73272024 |
| chr20 | 44520237  | CTSA               | rs397784956 | CCTG | C    | 0.637931  | 0.0369388 | 0.73272024 |
| chr2  | 37406680  | SULT6B1            | rs10205833  | C    | G    | 0.241379  | 0.0369661 | 0.73272024 |
| chr14 | 76156609  | TTLL5              | rs2303345   | C    | T    | 0.643678  | 0.0370474 | 0.73272024 |
| chr9  | 75315438  | TMC1               | rs1796993   | G    | A    | 0.183908  | 0.0371071 | 0.73272024 |
| chr12 | 108618630 | WSCD2              | rs3764002   | C    | T    | 0.270115  | 0.0371637 | 0.73272024 |
| chr19 | 50093248  | PRRG2              | rs144521999 | A    | T    | 0.126437  | 0.0372063 | 0.73272024 |
| chr1  | 223954080 | CAPN2              | rs17599     | A    | C    | 0.218391  | 0.0372079 | 0.73272024 |
| chr20 | 31619500  | BPIL3              | rs17301126  | C    | T    | 0.103448  | 0.0372196 | 0.73272024 |
| chr4  | 153896358 | FHDC1              | rs3811833   | C    | T    | 0.741379  | 0.0372401 | 0.73272024 |
| chr10 | 98924600  | ARHGAP19-<br>SLIT1 | rs41307074  | G    | A    | 0.0574713 | 0.0373293 | 0.73272024 |
| chr10 | 98924600  | SLIT1              | rs41307074  | G    | A    | 0.0574713 | 0.0373293 | 0.73272024 |
| chrX  | 138633280 | F9                 | rs6048      | A    | G    | 0.143678  | 0.0373604 | 0.73272024 |
| chr22 | 28194933  | MN1                | rs45480998  | T    | TTGC | 0.16092   | 0.0373748 | 0.73272024 |
| chr22 | 28194933  | MN1                | rs34890218  | T    | TTGC | 0.16092   | 0.0373748 | 0.73272024 |
| chr22 | 30762140  | CCDC157            | rs740223    | G    | A    | 0.258621  | 0.0374864 | 0.73272024 |
| chr22 | 30776095  | RNF215             | rs5749088   | C    | T    | 0.258621  | 0.0374864 | 0.73272024 |
| chr22 | 44368122  | SAMM50             | rs3761472   | A    | G    | 0.132184  | 0.0374892 | 0.73272024 |

|       |           |          |             |   |    |           |           |            |
|-------|-----------|----------|-------------|---|----|-----------|-----------|------------|
| chrX  | 150817094 | PASD1    | rs5924658   | C | G  | 0.149425  | 0.0375484 | 0.73304524 |
| chr22 | 38877461  | KDEL3    | rs12004     | T | G  | 0.304598  | 0.0376007 | 0.73323494 |
| chr5  | 93987532  | ANKRD32  | rs6891545   | C | A  | 0.178161  | 0.0377827 | 0.73360061 |
| chr16 | 1252369   | CACNA1H  | rs61734410  | C | T  | 0.316092  | 0.037799  | 0.73360061 |
| chr17 | 39137297  | KRT40    | rs721957    | C | T  | 0.58046   | 0.0378099 | 0.73360061 |
| chr13 | 44411432  | CCDC122  | rs9567280   | A | G  | 0.0747126 | 0.0382236 | 0.73360061 |
| chr5  | 79616936  | SPZ1     | rs35337118  | A | C  | 0.178161  | 0.0382761 | 0.73360061 |
| chr19 | 12186921  | ZNF844   | rs8102258   | T | C  | 0.0804598 | 0.0382871 | 0.73360061 |
| chr9  | 98638288  | C9orf102 | rs690528    | A | G  | 0.373563  | 0.0383    | 0.73360061 |
| chr13 | 29855847  | MTUS2    | rs3751336   | C | T  | 0.0574713 | 0.0384386 | 0.73360061 |
| chr4  | 48082095  | TXK      | rs11724347  | C | T  | 0.0517241 | 0.0384414 | 0.73360061 |
| chr5  | 140562739 | PCDHB16  | rs61743469  | G | A  | 0.0689655 | 0.0384554 | 0.73360061 |
| chr12 | 10782115  | STYK1    | rs3759259   | T | C  | 0.54023   | 0.0384621 | 0.73360061 |
| chr20 | 57829301  | ZNF831   | rs259956    | T | C  | 0.505747  | 0.0385659 | 0.73360061 |
| chr4  | 5894398   | CRMP1    | rs139357095 | C | G  | 0.0517241 | 0.038571  | 0.73360061 |
| chr8  | 30703431  | TEX15    | rs323346    | T | C  | 0.149425  | 0.0385997 | 0.73360061 |
| chr8  | 30706224  | TEX15    | rs323347    | A | G  | 0.149425  | 0.0385997 | 0.73360061 |
| chr6  | 30558477  | ABCF1    | rs4148252   | G | GA | 0.701149  | 0.0386127 | 0.73360061 |
| chr7  | 6193752   | USP42    | rs61753119  | G | A  | 0.114943  | 0.0386133 | 0.73360061 |
| chr16 | 70934974  | HYDIN    | rs12102425  | T | C  | 0.0689655 | 0.0386441 | 0.73360061 |
| chr20 | 62194713  | PRIC285  | rs3810486   | A | C  | 0.212644  | 0.0387788 | 0.73360061 |
| chr20 | 62195220  | PRIC285  | rs3827022   | C | T  | 0.212644  | 0.0387788 | 0.73360061 |
| chr20 | 62196033  | PRIC285  | rs3810487   | C | T  | 0.212644  | 0.0387788 | 0.73360061 |
| chr20 | 62200576  | PRIC285  | rs6090457   | G | A  | 0.212644  | 0.0387788 | 0.73360061 |
| chr7  | 150325175 | GIMAP6   | rs13234724  | C | T  | 0.201149  | 0.0388072 | 0.73360061 |
| chr6  | 49814379  | CRISP1   | rs3209304   | T | C  | 0.126437  | 0.0388142 | 0.73360061 |
| chr4  | 104066461 | CENPE    | rs2615542   | A | G  | 0.183908  | 0.0388535 | 0.73360061 |
| chr6  | 32549588  | HLA-DRB1 | rs201929247 | G | A  | 0.212644  | 0.0388809 | 0.73360061 |
| chr17 | 41931375  | CD300LG  | rs12453522  | A | G  | 0.218391  | 0.0389301 | 0.73360061 |
| chr16 | 3254470   | OR1F1    | rs1834026   | T | C  | 0.494253  | 0.0389734 | 0.73360061 |
| chr1  | 24421474  | MYOM3    | rs6678540   | G | A  | 0.396552  | 0.0390068 | 0.73360061 |

|       |           |            |             |      |                   |           |           |            |
|-------|-----------|------------|-------------|------|-------------------|-----------|-----------|------------|
| chr14 | 88852166  | SPATA7     | rs4904448   | G    | A                 | 0.385057  | 0.0391082 | 0.73360061 |
| chr2  | 160729005 | LY75-CD302 | rs1397706   | C    | T                 | 0.0747126 | 0.0391151 | 0.73360061 |
| chr2  | 160729005 | LY75       | rs1397706   | C    | T                 | 0.0747126 | 0.0391151 | 0.73360061 |
| chr3  | 157081324 | VEPH1      | rs11918974  | A    | G                 | 0.287356  | 0.0391891 | 0.73360061 |
| chr4  | 57215677  | AASDH      | rs3796544   | G    | A                 | 0.454023  | 0.0392828 | 0.73360061 |
| chr16 | 19041595  | TMC7       | rs4072393   | G    | A                 | 0.666667  | 0.0394334 | 0.73360061 |
| chr10 | 77161100  | ZNF503     | .           | G    | GCCGCCTCCG<br>CCT | 0.0632184 | 0.0395929 | 0.73360061 |
| chr10 | 77161100  | ZNF503     | rs762649774 | G    | GCCGCCTCCG<br>CCT | 0.0632184 | 0.0395929 | 0.73360061 |
| chr14 | 105408182 | AHNAK2     | rs9672139   | T    | G                 | 0.482759  | 0.0396349 | 0.73360061 |
| chr19 | 1397443   | GAMT       | rs17851582  | G    | A                 | 0.0804598 | 0.0396541 | 0.73360061 |
| chr11 | 65735174  | SART1      | rs660118    | G    | C                 | 0.396552  | 0.0396849 | 0.73360061 |
| chr1  | 153004853 | SPRR1B     | rs3795382   | C    | T                 | 0.511494  | 0.0397086 | 0.73360061 |
| chr2  | 68385097  | PNO1       | rs2044693   | A    | G                 | 0.655172  | 0.0397168 | 0.73360061 |
| chr2  | 47382342  | C2orf61    | rs815804    | G    | T                 | 0.178161  | 0.0397229 | 0.73360061 |
| chr5  | 38955796  | RICTOR     | rs2043112   | G    | A                 | 0.442529  | 0.0397831 | 0.73360061 |
| chr16 | 71683718  | PHLPP2     | rs61733127  | A    | G                 | 0.183908  | 0.0399007 | 0.73360061 |
| chr4  | 40778162  | NSUN7      | rs2437323   | T    | G                 | 0.804598  | 0.0399037 | 0.73360061 |
| chr8  | 17396380  | SLC7A2     | rs13259948  | G    | A                 | 0.183908  | 0.0399143 | 0.73360061 |
| chr18 | 48346024  | MRO        | rs3813089   | G    | T                 | 0.224138  | 0.0399365 | 0.73360061 |
| chr10 | 63977980  | RTKN2      | rs61850830  | C    | T                 | 0.0862069 | 0.0399436 | 0.73360061 |
| chr5  | 68616331  | CCDC125    | rs10471774  | C    | T                 | 0.471264  | 0.0399699 | 0.73360061 |
| chr6  | 41903782  | CCND3      | rs1051130   | A    | C                 | 0.517241  | 0.0400044 | 0.73360061 |
| chr1  | 3679775   | CCDC27     | rs10910024  | C    | T                 | 0.235632  | 0.0400553 | 0.73360061 |
| chr20 | 44004155  | TP53TG5    | rs10546815  | CATT | C                 | 0.672414  | 0.0400819 | 0.73360061 |
| chr20 | 44004155  | SYS1       | rs10546815  | CATT | C                 | 0.672414  | 0.0400819 | 0.73360061 |
| chr15 | 99762041  | TTC23      | rs78534478  | C    | T                 | 0.0689655 | 0.040084  | 0.73360061 |
| chr4  | 71468345  | AMBN       | rs141384720 | CAGG | C                 | 0.091954  | 0.0400875 | 0.73360061 |
| chr4  | 71469604  | AMBN       | rs7439186   | C    | T                 | 0.091954  | 0.0400875 | 0.73360061 |
| chr20 | 34596371  | C20orf152  | rs6060750   | C    | T                 | 0.178161  | 0.0401375 | 0.73360061 |
| chr10 | 103298099 | BTRC       | rs4151060   | G    | T                 | 0.0804598 | 0.0401404 | 0.73360061 |

|       |           |          |             |      |   |           |           |            |
|-------|-----------|----------|-------------|------|---|-----------|-----------|------------|
| chr5  | 168212951 | SLIT3    | rs891921    | A    | G | 0.902299  | 0.0401511 | 0.73360061 |
| chr10 | 72015573  | NPFRR1   | rs3812694   | T    | G | 0.0804598 | 0.0401757 | 0.73360061 |
| chr14 | 100705787 | YY1      | rs568477380 | GCCA | G | 0.0517241 | 0.0403222 | 0.73473017 |
| chr21 | 46641968  | ADARB1   | rs1051367   | G    | A | 0.517241  | 0.0403229 | 0.73473017 |
| chr2  | 61483548  | USP34    | rs72811482  | A    | T | 0.0804598 | 0.040428  | 0.73586652 |
| chr1  | 15909744  | AGMAT    | rs11580170  | C    | T | 0.247126  | 0.040816  | 0.74002597 |
| chr15 | 85163998  | ZSCAN2   | rs2044502   | G    | C | 0.850575  | 0.0408881 | 0.74002597 |
| chr7  | 141752215 | MGAM     | rs116536012 | A    | C | 0.0574713 | 0.0408972 | 0.74002597 |
| chr8  | 145541766 | DGAT1    | rs55962377  | G    | T | 0.0747126 | 0.0408983 | 0.74002597 |
| chr15 | 84651057  | ADAMTSL3 | rs140206840 | G    | A | 0.0574713 | 0.0410044 | 0.74002597 |
| chr5  | 149755744 | TCOF1    | rs2071240   | G    | C | 0.0632184 | 0.0410927 | 0.74002597 |
| chr19 | 17337882  | OCEL1    | rs891203    | C    | G | 0.137931  | 0.041111  | 0.74002597 |
| chr10 | 71060610  | HK1      | rs906220    | A    | G | 0.885057  | 0.0411927 | 0.74002597 |
| chr15 | 102264304 | TARSL2   | rs1143138   | G    | C | 0.304598  | 0.0413026 | 0.74002597 |
| chr14 | 45606287  | FANCM    | rs10138997  | C    | T | 0.0574713 | 0.041446  | 0.74002597 |
| chr9  | 100122291 | C9orf174 | rs3747495   | T    | C | 0.143678  | 0.0414499 | 0.74002597 |
| chr9  | 100122291 | BDAG1    | rs3747495   | T    | C | 0.143678  | 0.0414499 | 0.74002597 |
| chr11 | 56185345  | OR5R1    | rs6591324   | A    | G | 0.758621  | 0.0414715 | 0.74002597 |
| chr10 | 115804036 | ADRB1    | rs1801252   | A    | G | 0.143678  | 0.0415369 | 0.74002597 |
| chr6  | 165703523 | C6orf118 | rs17856754  | C    | T | 0.0747126 | 0.0415662 | 0.74002597 |
| chr6  | 165706935 | C6orf118 | rs9459350   | C    | G | 0.0747126 | 0.0415662 | 0.74002597 |
| chr19 | 55349273  | KIR2DS4  | rs1130492   | C    | A | 0.143678  | 0.0418135 | 0.74002597 |
| chrX  | 1314931   | CRLF2    | rs151218732 | C    | T | 0.0862069 | 0.0418435 | 0.74002597 |
| chr16 | 1306346   | TPSD1    | rs3865205   | C    | T | 0.0804598 | 0.0418523 | 0.74002597 |
| chr20 | 62373707  | SLC2A4RG | rs8957      | G    | T | 0.781609  | 0.0420256 | 0.74002597 |
| chr15 | 42681199  | CAPN3    | rs1801449   | G    | A | 0.0517241 | 0.0421107 | 0.74002597 |
| chr14 | 105965102 | C14orf80 | rs34137879  | G    | A | 0.0517241 | 0.0421249 | 0.74002597 |
| chr19 | 51361757  | KLK3     | rs17632542  | T    | C | 0.0977011 | 0.0421502 | 0.74002597 |
| chr2  | 48921375  | LHCGR    | rs2293275   | T    | C | 0.649425  | 0.0422548 | 0.74002597 |
| chr12 | 52284500  | ANKRD33  | rs34494292  | A    | G | 0.281609  | 0.0422894 | 0.74002597 |
| chr12 | 52285086  | ANKRD33  | rs3180417   | G    | A | 0.281609  | 0.0422894 | 0.74002597 |

|       |           |          |             |   |      |           |           |            |
|-------|-----------|----------|-------------|---|------|-----------|-----------|------------|
| chr17 | 39383073  | KRTAP9-2 | rs9902235   | G | C    | 0.66092   | 0.0422948 | 0.74002597 |
| chr3  | 196388099 | LRR33    | rs62623661  | G | C    | 0.137931  | 0.0422988 | 0.74002597 |
| chr5  | 37173930  | C5orf42  | rs10076911  | A | C    | 0.0689655 | 0.0423151 | 0.74002597 |
| chr5  | 37182902  | C5orf42  | rs75589774  | G | A    | 0.0689655 | 0.0423151 | 0.74002597 |
| chr16 | 54318172  | IRX3     | rs1126960   | C | A    | 0.247126  | 0.0424369 | 0.74002597 |
| chr2  | 73675227  | ALMS1    | rs34628045  | T | TCTC | 0.632184  | 0.042447  | 0.74002597 |
| chr2  | 73828538  | ALMS1    | rs1052161   | G | A    | 0.632184  | 0.042447  | 0.74002597 |
| chr19 | 8670147   | ADAMTS10 | rs62621197  | C | T    | 0.0517241 | 0.0424709 | 0.74002597 |
| chr19 | 54782919  | LILRB2   | rs386056    | C | T    | 0.195402  | 0.0424764 | 0.74002597 |
| chr19 | 54784130  | LILRB2   | rs383369    | T | C    | 0.195402  | 0.0424764 | 0.74002597 |
| chr21 | 43413553  | ZNF295   | rs871546    | T | G    | 0.258621  | 0.0425447 | 0.74002597 |
| chr7  | 21940823  | CDCA7L   | rs77448980  | A | G    | 0.0747126 | 0.0426057 | 0.74002597 |
| chr7  | 21940823  | DNAH11   | rs77448980  | A | G    | 0.0747126 | 0.0426057 | 0.74002597 |
| chr1  | 117529458 | PTGFRN   | rs10801922  | G | A    | 0.37931   | 0.0426461 | 0.74002597 |
| chr19 | 52249947  | FPR1     | rs2070745   | C | G    | 0.310345  | 0.0426526 | 0.74002597 |
| chr8  | 87076520  | PSKH2    | rs6998760   | C | A    | 0.321839  | 0.0426863 | 0.74002597 |
| chr17 | 76134237  | TMC8     | rs11651675  | G | A    | 0.0517241 | 0.0426914 | 0.74002597 |
| chr15 | 40558064  | PAK6     | rs2412504   | A | G    | 0.0977011 | 0.0427087 | 0.74002597 |
| chr15 | 40558482  | PAK6     | rs3743135   | A | G    | 0.0977011 | 0.0427087 | 0.74002597 |
| chr17 | 30183857  | C17orf79 | rs8068049   | T | C    | 0.833333  | 0.0427493 | 0.74002597 |
| chr2  | 218713282 | TNS1     | rs3796033   | G | A    | 0.373563  | 0.0427601 | 0.74002597 |
| chr1  | 110279701 | GSTM3    | rs7483      | C | T    | 0.316092  | 0.0427804 | 0.74002597 |
| chr6  | 133045902 | VNN3     | rs2294759   | A | G    | 0.287356  | 0.042802  | 0.74002597 |
| chr5  | 13902220  | DNAH5    | rs1530498   | T | C    | 0.350575  | 0.0428292 | 0.74002597 |
| chr2  | 207631461 | FASTKD2  | rs3762568   | G | A    | 0.0574713 | 0.0429287 | 0.74002597 |
| chr19 | 8138054   | FBN3     | rs7257948   | C | A    | 0.568966  | 0.0429386 | 0.74002597 |
| chr19 | 56001665  | SSC5D    | rs114976626 | C | T    | 0.0517241 | 0.0430563 | 0.74002597 |
| chr19 | 56011573  | SSC5D    | rs61747393  | C | T    | 0.0517241 | 0.0430563 | 0.74002597 |
| chr19 | 55993436  | ZNF628   | rs147110934 | G | T    | 0.0517241 | 0.0430563 | 0.74002597 |
| chr12 | 93196422  | EEA1     | rs10745623  | T | G    | 0.586207  | 0.0430776 | 0.74002597 |
| chr11 | 6555365   | DNHD1    | rs7103810   | A | G    | 0.885057  | 0.0431278 | 0.74002597 |

|       |           |                    |             |   |       |           |           |            |
|-------|-----------|--------------------|-------------|---|-------|-----------|-----------|------------|
| chr13 | 50141345  | RCBTB1             | rs4942848   | G | A     | 0.66092   | 0.0431492 | 0.74002597 |
| chr3  | 124746049 | HEG1               | rs2981546   | A | G     | 0.5       | 0.0432788 | 0.74123687 |
| chr4  | 169362557 | DDX60L             | rs13151700  | C | G     | 0.373563  | 0.0433059 | 0.74123687 |
| chr14 | 70924602  | ADAM21             | rs72735759  | T | G     | 0.0574713 | 0.0434196 | 0.74170843 |
| chr14 | 70925501  | ADAM21             | rs72735760  | G | C     | 0.0574713 | 0.0434196 | 0.74170843 |
| chr1  | 24447468  | IL22RA1            | rs3795299   | G | C     | 0.333333  | 0.0434788 | 0.7419836  |
| chr10 | 124742895 | PSTK               | rs3736582   | G | C     | 0.655172  | 0.0436983 | 0.7449552  |
| chr3  | 124732618 | HEG1               | rs6790837   | A | G     | 0.505747  | 0.0438311 | 0.7449552  |
| chr7  | 106509331 | PIK3CG             | rs17847825  | C | A     | 0.0862069 | 0.0438729 | 0.7449552  |
| chr19 | 3831449   | ZFR2               | rs2240232   | G | A     | 0.362069  | 0.0439928 | 0.7449552  |
| chr19 | 3831525   | ZFR2               | rs2240233   | C | A     | 0.362069  | 0.0439928 | 0.7449552  |
| chr19 | 3831765   | ZFR2               | rs2240235   | G | A     | 0.362069  | 0.0439928 | 0.7449552  |
| chr1  | 67243024  | TCTEX1D1           | rs2133173   | C | A     | 0.327586  | 0.0440068 | 0.7449552  |
| chr16 | 20810067  | ERI2               | rs3213646   | T | C     | 0.534483  | 0.0441801 | 0.7449552  |
| chr1  | 79095581  | IFI44L             | rs987495    | T | C     | 0.195402  | 0.0443096 | 0.7449552  |
| chr1  | 109391662 | AKNAD1             | rs11580913  | G | C     | 0.0977011 | 0.0443222 | 0.7449552  |
| chr19 | 11979305  | ZNF439             | rs72994214  | C | G     | 0.0574713 | 0.0444337 | 0.7449552  |
| chr12 | 21201663  | LST-3TM12          | rs11045689  | G | A     | 0.689655  | 0.0444693 | 0.7449552  |
| chr1  | 100598866 | CCDC76             | rs472498    | G | A     | 0.873563  | 0.0444859 | 0.7449552  |
| chr1  | 100598867 | CCDC76             | rs687513    | C | T     | 0.873563  | 0.0444859 | 0.7449552  |
| chr4  | 1019011   | FGFRL1             | rs4647932   | C | T     | 0.0574713 | 0.0445608 | 0.7449552  |
| chr17 | 56598991  | SEPT4              | rs17741424  | T | A     | 0.149425  | 0.0445972 | 0.7449552  |
| chr20 | 62326110  | RTEL1-<br>TNFRSF6B | rs3208008   | A | C     | 0.787356  | 0.0446397 | 0.7449552  |
| chr20 | 62326110  | RTEL1              | rs3208008   | A | C     | 0.787356  | 0.0446397 | 0.7449552  |
| chr19 | 9006749   | MUC16              | rs75444444  | C | T     | 0.189655  | 0.0447431 | 0.7449552  |
| chr11 | 5510540   | OR52D1             | rs190320444 | G | GGGCT | 0.172414  | 0.044892  | 0.7449552  |
| chr11 | 5510540   | OR52D1             | rs146317894 | G | GGGCT | 0.172414  | 0.044892  | 0.7449552  |
| chr6  | 28963248  | ZNF311             | rs6456880   | T | G     | 0.425287  | 0.044948  | 0.7449552  |
| chr22 | 30975861  | PES1               | rs34123894  | C | T     | 0.0632184 | 0.0449584 | 0.7449552  |
| chr20 | 17950545  | C20orf72           | rs11551768  | A | T     | 0.109195  | 0.0450794 | 0.7449552  |

|       |           |           |             |     |      |           |           |           |
|-------|-----------|-----------|-------------|-----|------|-----------|-----------|-----------|
| chr1  | 11579504  | PTCHD2    | rs2072993   | G   | C    | 0.0977011 | 0.0451678 | 0.7449552 |
| chr16 | 28508892  | APOBR     | rs34395441  | G   | A    | 0.0574713 | 0.0452497 | 0.7449552 |
| chr10 | 29581493  | LYZL1     | rs3818551   | A   | C    | 0.212644  | 0.0452758 | 0.7449552 |
| chr10 | 85991784  | LRIT1     | rs3814211   | T   | C    | 0.0804598 | 0.0452896 | 0.7449552 |
| chr1  | 152975941 | SPRR3     | rs1055935   | C   | G    | 0.517241  | 0.0453244 | 0.7449552 |
| chrX  | 6975782   | HDHD1     | rs868756    | C   | G    | 0.494253  | 0.0454416 | 0.7449552 |
| chr7  | 2645552   | IQCE      | rs2293407   | A   | G    | 0.333333  | 0.0454703 | 0.7449552 |
| chr6  | 29141632  | OR2J2     | rs3116855   | T   | C    | 0.517241  | 0.0455555 | 0.7449552 |
| chr2  | 228493211 | C2orf83   | rs28739019  | G   | A    | 0.258621  | 0.0455634 | 0.7449552 |
| chr11 | 55339829  | OR4C16    | rs557590    | A   | G    | 0.91954   | 0.0455634 | 0.7449552 |
| chr1  | 180905448 | KIAA1614  | rs3795504   | G   | T    | 0.436782  | 0.0455864 | 0.7449552 |
| chr5  | 80168937  | MSH3      | rs26279     | G   | A    | 0.729885  | 0.0456176 | 0.7449552 |
| chr3  | 142078759 | XRN1      | rs73238159  | C   | T    | 0.155172  | 0.0456751 | 0.7449552 |
| chr19 | 4217576   | ANKRD24   | rs150106684 | G   | C    | 0.0804598 | 0.0456904 | 0.7449552 |
| chr3  | 158520011 | MFSD1     | rs28364680  | C   | T    | 0.0517241 | 0.0457106 | 0.7449552 |
| chr19 | 43773532  | PSG9      | rs8101191   | G   | C    | 0.0574713 | 0.0458151 | 0.7449552 |
| chr7  | 2644519   | IQCE      | rs2293404   | C   | T    | 0.327586  | 0.0458207 | 0.7449552 |
| chr16 | 3367229   | ZNF75A    | rs17611866  | T   | C    | 0.229885  | 0.0458469 | 0.7449552 |
| chr18 | 30804758  | C18orf34  | rs457896    | A   | C    | 0.12069   | 0.0458525 | 0.7449552 |
| chr5  | 102894673 | NUDT12    | rs34468716  | T   | C    | 0.0862069 | 0.0459906 | 0.7449552 |
| chr2  | 47251469  | TTC7A     | rs2304290   | G   | C    | 0.114943  | 0.0461277 | 0.7449552 |
| chr1  | 17312743  | ATP13A2   | rs3170740   | C   | T    | 0.448276  | 0.0461998 | 0.7449552 |
| chr10 | 115439640 | CASP7     | rs10553596  | CTT | C    | 0.235632  | 0.0462589 | 0.7449552 |
| chr22 | 31491332  | SMTN      | rs5997872   | C   | T    | 0.126437  | 0.0463015 | 0.7449552 |
| chr5  | 113698631 | KCNN2     | rs151038013 | T   | TGCC | 0.396552  | 0.0463473 | 0.7449552 |
| chr14 | 60585131  | C14orf135 | rs308998    | A   | G    | 0.103448  | 0.046426  | 0.7449552 |
| chr14 | 60591887  | C14orf135 | rs167437    | G   | A    | 0.103448  | 0.046426  | 0.7449552 |
| chr14 | 60582053  | C14orf135 | rs150688    | G   | A    | 0.896552  | 0.0464423 | 0.7449552 |
| chr14 | 24883887  | NYNRIN    | rs8017377   | G   | A    | 0.494253  | 0.0464517 | 0.7449552 |
| chr19 | 33878837  | PEPD      | rs17570     | G   | A    | 0.183908  | 0.0465259 | 0.7449552 |
| chr4  | 185655192 | MLF1IP    | rs876839    | G   | C    | 0.0632184 | 0.0465376 | 0.7449552 |

|       |           |           |             |      |   |           |           |           |
|-------|-----------|-----------|-------------|------|---|-----------|-----------|-----------|
| chr19 | 57723007  | ZNF264    | rs2074858   | G    | C | 0.58046   | 0.0465882 | 0.7449552 |
| chr19 | 57723013  | ZNF264    | rs917340    | G    | A | 0.58046   | 0.0465882 | 0.7449552 |
| chr12 | 32134815  | C12orf35  | rs16919122  | G    | A | 0.126437  | 0.0465916 | 0.7449552 |
| chr10 | 96954298  | C10orf129 | rs591157    | A    | G | 0.557471  | 0.0466223 | 0.7449552 |
| chr6  | 33141280  | COL11A2   | rs2855430   | G    | A | 0.0977011 | 0.0466465 | 0.7449552 |
| chr2  | 73492614  | FBXO41    | rs526106    | A    | T | 0.252874  | 0.0466896 | 0.7449552 |
| chr2  | 29240783  | FAM179A   | rs1109758   | A    | G | 0.281609  | 0.0467111 | 0.7449552 |
| chr19 | 55823344  | BRSK1     | rs12978445  | G    | A | 0.149425  | 0.0467163 | 0.7449552 |
| chr19 | 53994802  | ZNF813    | rs10422163  | A    | T | 0.126437  | 0.0467244 | 0.7449552 |
| chr5  | 137500665 | BRD8      | rs11750814  | G    | A | 0.189655  | 0.0467619 | 0.7449552 |
| chr17 | 7592168   | WRAP53    | rs2287499   | C    | G | 0.091954  | 0.0467816 | 0.7449552 |
| chr21 | 30925928  | GRIK1     | rs363504    | A    | G | 0.0689655 | 0.0468055 | 0.7449552 |
| chr16 | 67876823  | THAP11    | rs377516180 | ACAG | A | 0.137931  | 0.046896  | 0.7449552 |
| chr2  | 219544388 | STK36     | rs1863703   | A    | G | 0.0574713 | 0.0469176 | 0.7449552 |
| chr2  | 219553468 | STK36     | rs16859180  | C    | T | 0.0574713 | 0.0469176 | 0.7449552 |
| chr2  | 219563602 | STK36     | rs12993599  | G    | A | 0.0574713 | 0.0469176 | 0.7449552 |
| chr19 | 9968434   | OLFM2     | rs2303100   | C    | T | 0.58046   | 0.0469208 | 0.7449552 |
| chr1  | 3669205   | CCDC27    | rs10910021  | C    | G | 0.367816  | 0.0469407 | 0.7449552 |
| chr19 | 35434448  | ZNF30     | rs62122088  | A    | G | 0.132184  | 0.0471085 | 0.7449552 |
| chr1  | 204966428 | NFASC     | rs2802808   | C    | G | 0.252874  | 0.0471192 | 0.7449552 |
| chr11 | 129722553 | TMEM45B   | rs558813    | C    | T | 0.183908  | 0.0471798 | 0.7449552 |
| chr4  | 151773593 | LRBA      | rs1782360   | G    | C | 0.0517241 | 0.0472316 | 0.7449552 |
| chr12 | 10251445  | CLEC1A    | rs2306894   | C    | G | 0.844828  | 0.0473331 | 0.7449552 |
| chr1  | 247769752 | OR2G3     | rs61730407  | A    | G | 0.402299  | 0.0473454 | 0.7449552 |
| chr12 | 53044267  | KRT2      | rs638043    | C    | T | 0.149425  | 0.0473704 | 0.7449552 |
| chr20 | 57768607  | ZNF831    | rs181984    | G    | C | 0.0517241 | 0.0474287 | 0.7449552 |
| chr4  | 38138856  | TBC1D1    | rs13110318  | G    | A | 0.103448  | 0.0474932 | 0.7449552 |
| chr16 | 5139186   | FAM86A    | rs12928528  | G    | C | 0.58046   | 0.047615  | 0.7449552 |
| chr16 | 624114    | PIGQ      | rs2071979   | A    | G | 0.367816  | 0.0476641 | 0.7449552 |
| chr16 | 633125    | PIGQ      | rs1045277   | T    | C | 0.367816  | 0.0476641 | 0.7449552 |
| chr11 | 56185224  | OR5R1     | rs12785840  | A    | G | 0.109195  | 0.0476757 | 0.7449552 |

|       |           |          |             |   |   |           |           |           |
|-------|-----------|----------|-------------|---|---|-----------|-----------|-----------|
| chr10 | 96602623  | CYP2C19  | rs3758581   | G | A | 0.0574713 | 0.0478003 | 0.7449552 |
| chr20 | 33874720  | FAM83C   | rs2425049   | C | T | 0.149425  | 0.0478125 | 0.7449552 |
| chr3  | 66287056  | SLC25A26 | rs146159281 | G | A | 0.350575  | 0.0478352 | 0.7449552 |
| chr19 | 44652954  | ZNF234   | rs2293587   | G | A | 0.344828  | 0.0478359 | 0.7449552 |
| chr13 | 47243196  | LRCH1    | rs41284185  | C | G | 0.0862069 | 0.0478513 | 0.7449552 |
| chr16 | 76532583  | CNTNAP4  | rs12933808  | A | G | 0.885057  | 0.0478671 | 0.7449552 |
| chr20 | 42355169  | GTSF1L   | rs17826038  | G | C | 0.0517241 | 0.0478742 | 0.7449552 |
| chr2  | 98736225  | VWA3B    | rs2305355   | C | T | 0.0517241 | 0.0479301 | 0.7449552 |
| chr2  | 95947085  | PROM2    | rs12992066  | A | G | 0.724138  | 0.0479438 | 0.7449552 |
| chr4  | 144621779 | FREM3    | rs55935372  | A | G | 0.350575  | 0.0479581 | 0.7449552 |
| chr19 | 51728641  | CD33     | rs2455069   | A | G | 0.431034  | 0.0479844 | 0.7449552 |
| chr8  | 143922620 | GML      | rs3764795   | C | T | 0.0632184 | 0.0481269 | 0.7449552 |
| chr11 | 308314    | IFITM2   | rs14408     | T | C | 0.431034  | 0.0481349 | 0.7449552 |
| chr21 | 43808627  | TMPRSS3  | rs35227181  | C | T | 0.132184  | 0.0481741 | 0.7449552 |
| chr4  | 187630590 | FAT1     | rs3733415   | G | A | 0.172414  | 0.048257  | 0.7449552 |
| chr19 | 9968139   | OLFM2    | rs11556087  | G | A | 0.241379  | 0.0482818 | 0.7449552 |
| chr22 | 39134207  | SUN2     | rs2072797   | C | T | 0.103448  | 0.0483067 | 0.7449552 |
| chr10 | 115377290 | NRAP     | rs77678145  | T | C | 0.0977011 | 0.0483463 | 0.7449552 |
| chr8  | 17396415  | SLC7A2   | rs13259978  | G | C | 0.201149  | 0.0483945 | 0.7449552 |
| chr19 | 51323473  | KLK1     | rs5516      | C | G | 0.632184  | 0.0485341 | 0.7449552 |
| chr14 | 105406372 | AHNAK2   | rs61421370  | C | T | 0.45977   | 0.0485484 | 0.7449552 |
| chr14 | 105409907 | AHNAK2   | rs10141053  | T | C | 0.45977   | 0.0485484 | 0.7449552 |
| chr12 | 122186317 | TMEM120B | rs28655666  | G | A | 0.574713  | 0.048601  | 0.7449552 |
| chr9  | 112219474 | PTPN3    | rs3793524   | C | G | 0.344828  | 0.0486978 | 0.7449552 |
| chr19 | 56703248  | ZSCAN5B  | rs527025    | G | A | 0.356322  | 0.048755  | 0.7449552 |
| chr9  | 96021312  | WNK2     | rs10761203  | G | A | 0.505747  | 0.0487586 | 0.7449552 |
| chr1  | 79093818  | IFI44L   | rs273259    | A | G | 0.281609  | 0.0488657 | 0.7449552 |
| chr17 | 46847364  | TTLL6    | rs2032844   | C | A | 0.270115  | 0.0488664 | 0.7449552 |
| chr11 | 5602929   | OR52B6   | rs74053516  | C | A | 0.0804598 | 0.048917  | 0.7449552 |
| chr3  | 14745857  | C3orf20  | rs17040196  | G | A | 0.482759  | 0.0489597 | 0.7449552 |
| chr11 | 116691675 | APOA4    | rs675       | T | A | 0.201149  | 0.0489758 | 0.7449552 |

|       |           |          |            |    |   |           |           |           |
|-------|-----------|----------|------------|----|---|-----------|-----------|-----------|
| chr1  | 119469188 | TBX15    | rs10494217 | G  | T | 0.206897  | 0.0490163 | 0.7449552 |
| chr19 | 38202515  | ZNF607   | rs12461753 | G  | A | 0.16092   | 0.04902   | 0.7449552 |
| chr5  | 140801104 | PCDHGA11 | rs11167744 | T  | C | 0.103448  | 0.0490641 | 0.7449552 |
| chr5  | 140803241 | PCDHGA11 | rs57195665 | C  | A | 0.103448  | 0.0490641 | 0.7449552 |
| chr5  | 140772898 | PCDHGA8  | rs3214276  | GC | G | 0.103448  | 0.0490641 | 0.7449552 |
| chr19 | 43087484  | CEACAM8  | rs1126458  | A  | C | 0.126437  | 0.0491087 | 0.7449552 |
| chr19 | 37310344  | ZNF790   | rs3745775  | T  | C | 0.293103  | 0.0491277 | 0.7449552 |
| chr5  | 140595343 | PCDHB13  | rs56309578 | G  | C | 0.091954  | 0.0491448 | 0.7449552 |
| chr7  | 140158851 | MKRN1    | rs2272095  | C  | G | 0.241379  | 0.0492204 | 0.7449552 |
| chr7  | 107720162 | LAMB4    | rs9690688  | C  | A | 0.0632184 | 0.0492789 | 0.7449552 |
| chr6  | 38750888  | DNAH8    | rs3823430  | A  | G | 0.12069   | 0.0492867 | 0.7449552 |
| chr5  | 148206473 | ADRB2    | rs1042714  | G  | C | 0.603448  | 0.0493142 | 0.7449552 |
| chr17 | 78337058  | RNF213   | rs35332090 | G  | C | 0.0747126 | 0.0493574 | 0.7449552 |
| chr16 | 3640274   | SLX4     | rs714181   | G  | A | 0.0632184 | 0.0493574 | 0.7449552 |
| chr3  | 185990096 | DGKG     | rs2193587  | C  | T | 0.775862  | 0.0494689 | 0.7449552 |
| chr14 | 75248652  | YLPM1    | rs45617140 | C  | G | 0.109195  | 0.049531  | 0.7449552 |
| chr6  | 29080450  | OR2J3    | rs3130765  | G  | A | 0.821839  | 0.0495359 | 0.7449552 |
| chr4  | 87770252  | SLC10A6  | rs17694522 | G  | A | 0.0517241 | 0.0496464 | 0.7449552 |
| chr19 | 43234049  | PSG3     | rs28698193 | A  | T | 0.114943  | 0.0497647 | 0.7449552 |
| chr19 | 43268235  | PSG8     | rs75257969 | A  | C | 0.114943  | 0.0497647 | 0.7449552 |
| chr1  | 9009406   | CA6      | rs2274327  | C  | T | 0.5       | 0.049778  | 0.7449552 |
| chr2  | 219895548 | CCDC108  | rs56411706 | C  | A | 0.0804598 | 0.0497915 | 0.7449552 |
| chr2  | 219900068 | CCDC108  | rs17852959 | C  | T | 0.0804598 | 0.0497915 | 0.7449552 |
| chr3  | 46620614  | TDGF1    | rs11130097 | T  | C | 0.505747  | 0.0499125 | 0.7449552 |
| chr12 | 70091452  | BEST3    | rs1025016  | A  | G | 0.0747126 | 0.0499257 | 0.7449552 |
| chr5  | 68695940  | RAD17    | rs1045051  | T  | G | 0.310345  | 0.0499499 | 0.7449552 |
